## RESEARCH REPORT

# NAC1 directs CEP1-CEP3 peptidase expression and **modulates** root hair growth in Arabidopsis

Diana R. Rodríguez-García<sup>1</sup>, Yossmayer del Carmen Rondón Guerrero<sup>1</sup>, Lucía Ferrero<sup>2</sup>, Andrés Hugo Rossi<sup>1</sup>, Esteban A. Miglietta<sup>1</sup>, Ariel A. Aptekmann<sup>3,4</sup>, Eliana Marzol<sup>1</sup>, Javier Martínez Pacheco<sup>1</sup>, Mariana Carignani<sup>1</sup>, Victoria **Berdion** Gabarain<sup>1</sup>, Leonel E. Lopez<sup>1</sup>, Gabriela Díaz Dominguez<sup>1</sup>, Cecilia Borassi<sup>1</sup>, José Juan Sánchez-Serrano<sup>6</sup>, Lin Xu<sup>5</sup>, Alejandro D. Nadra<sup>3,4</sup>, Enrique Rojo<sup>6</sup>, Federico Ariel<sup>2</sup>, José M. Estevez<sup>1,7,8,9,†</sup>

<sup>1</sup>Fundación Instituto Leloir and IIBBA-CONICET. Av. Patricias Argentinas 435, Buenos Aires C1405BWE, Argentina.

<sup>2</sup>Instituto de Agrobiotecnología del Litoral, CONICET, Universidad Nacional del Litoral, Colectora Ruta Nacional 168 km 0, 3000, Santa Fe, Argentina.

<sup>3</sup>Departamento de Fisiología, Biología Molecular y Celular, Instituto de Bociencias, Biotecnología y Biología Traslacional (iB3). Facultad de Ciencias Exactas y Naturales, Universidad de Buenos Aires, Ciudad Universitaria, Buenos Aires C1428EGA, Argentina.

<sup>4</sup>Departamento de Química Biológica, Facultad de Ciencias Exactas y Naturales, Universidad de Buenos Aires (IQUIBICEN-CONICET), Ciudad Universitaria, Buenos Aires C1428EGA, Argentina.

<sup>5</sup>National Laboratory of Plant Molecular Genetics, CAS Center for Excellence in Molecular Plant Sciences, Institute of Plant Physiology and Ecology, Shanghai Institutes for Biological Sciences, Chinese Academy of Sciences, Shanghai 200032, China

<sup>6</sup>Centro Nacional de Biotecnología, Consejo Superior de Investigaciones Científicas, Cantoblanco, E-28049 Madrid, Spain

<sup>7</sup>Centro de Biotecnología Vegetal, Facultad de Ciencias de la Vida, Universidad Andrés Bello and Millennium Institute for Integrative Biology (iBio), Santiago, Chile

<sup>8</sup>ANID – Millennium Institute for Integrative Biology (iBio), 7500000 Santiago, Chile

<sup>9</sup>ANID –Millennium Nucleus for the Development of Super Adaptable Plants (MN-SAP), 8331150 Santiago, Chile

<sup>†</sup> Correspondence should be addressed. Email: [jestevez@leloir.org.ar](mailto:jestevez@leloir.org.ar) (J.M.E).

Word count: x,xxx

33 **Running Head:** AtCEP1-AtCEP3 negatively **modulates** root hair growth.

34

35 **Author for Correspondence:**

36 *José M. Estevez*

37 Fundación Instituto Leloir, Av. Patricias Argentinas 435, Buenos Aires C1405BWE, Argentina.

38 TE: 54-115238-7500 EXT. 3206

39 Centro de Biotecnología Vegetal, Facultad de Ciencias de la Vida, Universidad Andrés Bello and

40 Millennium Institute for Integrative Biology (iBio), Santiago CP 8370146, Chile.

41 Email: [jestevez@leloir.org.ar](mailto:jestevez@leloir.org.ar)

42

43

44 **Special Issue:** Plant cell walls

45

46 Abstract Word count: **271**

47 Text Word count: **4,990**

48 Figures 4

49 References: 54

50

51

## 52 Abstract

53 Plant genomes encode a unique group of papain-type Cysteine EndoPeptidases (CysEPs)  
54 containing a KDEL endoplasmic reticulum (ER) retention signal (KDEL-CysEPs or CEPs). CEPs  
55 process the cell-wall scaffolding EXTENSIN proteins (EXTs), which regulate *de novo* cell wall  
56 formation and cell expansion. Since CEPs are able to cleave EXTs and EXT-related proteins,  
57 acting as cell wall-weakening agents, they may play a role in cell elongation. *Arabidopsis*  
58 *thaliana* genome encodes three CEPs (AtCPE1-AtCEP3). Here we report that the three  
59 *Arabidopsis* CEPs, *AtCEP1-AtCEP3*, are highly expressed in root-hair cell files. **Single mutants**  
60 **have no evident abnormal root-hair phenotype**, but *atcep1-3 atcep3-2* and *atcep1-3 atcep2-2*  
61 double mutants have longer root hairs (RHs) than wild type (Wt) plants, suggesting that  
62 expression of *AtCEPs* in root trichoblasts restrains polar elongation of the RH. **We provide**  
63 **evidence that the transcription factor *NAC1* activates *AtCEPs* expression in roots to limit RH**  
64 **growth. Chromatin immunoprecipitation indicates that *NAC1* binds the promoter of *AtCEP1*,**  
65 ***AtCEP2*, and to a lower extent to *AtCEP3* and may directly regulate their expression.** Indeed,  
66 **inducible *NAC1* overexpression increases *AtCEP1* and *AtCEP2* transcript levels in roots and leads**  
67 **to reduced RH growth while the loss of function *nac1-2* mutation reduces *AtCEP1-AtCEP3* gene**  
68 **expression and enhances RH growth. Likewise, expression of a dominant chimeric *NAC1-SRDX***  
69 **repressor construct leads to increased RH length. Finally, we show that RH cell walls in the**  
70 ***atcep1-1 atcep3-2* double mutant have reduced levels of EXT deposition, suggesting that the**  
71 **defects in RH elongation are linked to alterations in EXT processing and accumulation. Taken**  
72 **together, our results support the involvement of *AtCEPs* in controlling RH polar growth through**  
73 **EXT-processing and insolubilization at the cell wall.**

## 74 Introduction

75 In plants there is a unique group of papain-type Cysteine EndoPeptidases (CysEPs) containing a  
76 KDEL endoplasmic reticulum (ER) retention signal (KDEL-CysEPs or CEPs) for which no  
77 homologous genes have been identified in mammals or yeast (Gietl et al. 2000). CEPs are  
78 synthesized as pre-pro-enzyme and co-translationally translocated into the ER, where the pre-  
79 sequence is removed and the pro-enzyme is finally released from the rinosomes (ER-  
80 associated structures) upon vacuolar collapse and acidification of the cytosol, triggering the  
81 maturation of the enzyme (Schmid et al. 1999, 2001; Beers et al. 2000; Zhang et al. 2014).  
82 *AtCEP1* (At5g50260), *AtCEP2* (At3g48340), and *AtCEP3* (At3g48350) are three *Arabidopsis*  
83 *thaliana* AtCEPs with broad expression patterns in vegetative and reproductive tissues along  
84 the plant, including root tissues (Helm et al. 2008; Hierl et al. 2014; Zhou et al. 2016). Several  
85 CEPs have been identified in cells or tissues associated with programmed cell death (PCD),  
86 where they play crucial roles in intracellular protein degradation (Tanaka 1991; Becker et al.  
87 1997; He and Kermode 2003; Zhang et al. 2014; Olvera-Carrillo Y et al 2015; Chen et al. 2016).  
88 *AtCEP1* was found to be a central mediator of tapetal PCD, allowing tapetal cell degeneration  
89 and functional pollen formation (Zhang et al. 2014). In addition, *AtCEP1* and *AtCEP2* in  
90 *Arabidopsis* were found to be functional in the *de novo* emergence of adventitious root tips  
91 associated with EXT-degradation and regulated by the NAC1 transcription factor (Chen et al.  
92 2016). More recently, it was reported that *AtCEP1* and *AtCEP2* are expressed in root epidermal  
93 cells that separate to allow LR emergence, and that loss of function of *AtCEP1* or *AtCEP2* causes  
94 delayed emergence of LR primordia, suggesting that these KDEL-CysEPs might be involved in  
95 cell-wall remodelling for cell separation during development (Howing et al. 2018).

96 In addition to the papain-type preference for neutral amino acids with large aliphatic and non-  
97 polar (Leu, Val, Met) or aromatic (Phe, Tyr, Trp) side chains in the P2 position, Ricinus CEP  
98 (RcCysEP) exhibits an unusually broad substrate specificity. This broad substrate specificity is a  
99 result of the active site cleft of KDEL-CysEPs, which accepts a wide variety of amino acids,  
100 including proline and the glycosylated hydroxyproline of hydroxyproline-rich glycoproteins  
101 (HRGP) of the cell wall (Than et al. 2004). The amino acid residues that are essential for this  
102 generally more open structure of the active site cleft, as well as those that define the catalytic  
103 pocket, are highly conserved among known KDEL-CysEPs (Hierl et al. 2014). It can recognize the  
104 Ser-(Hyp)<sub>3-5</sub> repeats, *O*-glycosylated Hyp, and prolines at one-two amino acids relative to the  
105 cleavage site (Than et al., 2004; Helm et al. 2008; Hierl et al. 2014). These Ser-(Hyp)<sub>3-5</sub> repeats  
106 with *O*-glycosylated modifications are frequently observed in structural *O*-glycoproteins  
107 Extensins (EXTs) and possibly in a large number of uncharacterized apoplastic EXT-related  
108 proteins (e.g. PERK, Formins, AGP-EXTs hybrids) (Borassi et al. 2016). 59 encoded EXTs in  
109 *Arabidopsis thaliana* contain a Tyr-crosslinking motif close to an *O*-glycosylated Ser-(Hyp)<sub>3-5</sub>  
110 (Showalter et al., 2010; Marzol et al. 2018). EXT Tyr-mediated crosslinking is catalyzed by  
111 apoplastic peroxidases (Schnabelrauch et al., 1996; Jackson et al., 2001) and allows them to  
112 form glycoprotein networks in the cell wall, which influences *de novo* plant cell wall formation  
113 (Cannon et al., 2008) and in polar cell expansion processes (Velasquez et al. 2011; 2015).

114 Recently, it was shown that AtEXT3/RSH is not essential for early embryogenesis or plant  
115 viability suggesting that its function is likely to be redundant with other related EXT proteins  
116 (Doll et al. 2022). Since CEPs can cleave *O*-glycosylated EXTs (Hierl et al., 2014), thus acting as  
117 cell wall-weakening agents, this lends credence to the idea that CEPs may play a pivotal role in  
118 cell elongation. Prior to this study, we determined that at least six EXTs (EXT6–7, 12–14, 18) co-  
119 regulated at the transcriptional level play a crucial role in the polar-cell expansion process,  
120 specifically in RHs in *Arabidopsis* (Velasquez et al. 2011; Velasquez et al 2015; Marzol et al.  
121 2018) and in *Tomato* (Bucher et al. 1997; 2002). In this process, Leucine Rich Extensins 1 and 2  
122 (LRX1 and LRX2) were also found to be essential (Baumberger 2001, 2003; Ringli 2010). Pollen  
123 EXTs (PEXs) and LRXs were also recently linked to polar growth regulation in pollen tubes (Sede  
124 et al. 2018; Ndinyanka Fabrice et al., 2017; Wang et al., 2018), highlighting a conserved role of  
125 these EXT and EXT-related proteins in polar growth. On the basis of these previous findings, we  
126 hypothesized that *Arabidopsis* AtCEPs may play a role in polar-growth regulation linked to the  
127 processing of *O*-glycosylated EXT and EXT-related proteins processing and possibly other  
128 substrates during their maturation along the secretory pathway. Here, we provide evidence  
129 that, indeed, AtCEPs negatively regulate levels of EXT secretion/insolubilization at the cell-wall  
130 of root hairs (RHs) and **restrain** their growth.

131

## 132 Results and Discussion

133 Expression of *Arabidopsis* AtCEPs has been previously analysed using functional reporter  
134 constructs that include the coding sequences of AtCEP1 and AtCEP2 under the control of their  
135 respective regulatory regions of 2.0 Kb fragment upstream of the start codon, with HA and  
136 fluorescent protein tags, either GFP or mCherry (AtCEP1pro:PRE-PRO-3xHA-EGFP-AtCEP1-KDEL  
137 and AtCEP2pro:PRE-PRO-3xHA-mCherry-AtCEP2-KDEL) inserted between the pro-peptide and  
138 the mature enzyme sequence (Howing et al. 2014 and Hierl et al. 2014). Intriguingly, it was  
139 reported that AtCEP2pro:PRE-PRO-3xHA-mCherry-AtCEP2-KDEL is expressed specifically in  
140 non-protruding cell files of the hypocotyl, the cell files where stomata are formed, but not in  
141 protruding cell files (Hierl et al., 2014). Interestingly, the alternating pattern of non-protruding  
142 and protruding cell files in the hypocotyl is controlled by common mechanisms to the  
143 alternating pattern of root-hair cell (root trichoblast) and non-root-hair cell (root atrichoblast)  
144 files in the root. Hypocotyl non-protruding cells and root trichoblasts are always positioned over  
145 an anticlinal cell wall of the underlying cortex and lack expression of cell fate regulators of GL2  
146 and WER and the enhancer-trap marker J2301, whereas hypocotyl protruding cells and root  
147 atrichoblast are positioned over a periclinal cortex cell wall and express the J2301 marker and  
148 GL2 and WER, which block development of stomata or RHs in these cell files (Berger et al.,1998,  
149 Grierson et al., 2014). Importantly, we found that AtCEP2pro::PRE-PRO-3xHA-mCherry-AtCEP2  
150 is expressed in root epidermis exclusively in the trichoblasts (**Figure 1A-B; Figure S1**), further  
151 supporting that root-hair cell files share specification mechanisms and characteristics with non-  
152 protruding cell files of the hypocotyl (Berger et al.,1998, Grierson et al., 2014). AtCEP1pro:PRE-

153 PRO-3xHA-EGFP-AtCEP1 was also specifically expressed in root trichoblasts (**Figure 1A-B; Figure**  
154 **S1**). In these cells, the mCherry-AtCEP2 fusion protein was found in mobile punctate structures,  
155 consistent with it being localized in the endomembrane system.

156 To determine the nature of those organelles, we analysed for co-localization with established  
157 markers for different compartments (**Figure 2A**). The AtCEP2 labelled **spotted** and it did not co-  
158 localize **or at very low levels** with markers for the Golgi apparatus NAG1-GFP (0.10+-0.13) and  
159 N-ST-YFP (0.25+-0.16) (**Figure 2A**). However, we found higher co-localization levels in round or  
160 spindled shaped compartments with **the ER membrane marker KKXX-GFP-KDEL (0.63+-0.16)**  
161 **and with HDEL-GFP luminal ER marker (0.35+-0.15)**, indicating that AtCEP2 resides in an ER-  
162 derived compartment in root trichoblasts (**Figure 2B**). Indeed, AtCEP2 was observed in ER-  
163 derived compartments that resembled ricinosomes and ER-Bodies in leaf, hypocotyl, and root  
164 cap cells (Hierl et al. 2014; Howing et al. 2014). In addition, CEP2 mCherry was not detected in  
165 the apoplast space when plasmolysis was performed in root hairs (**Figure 2C**). On the other  
166 hand, apoplast targeting of AtCEPs has not been reported previously, possibly indicating that  
167 AtCEPs process their substrates within the secretory pathway. This confirms that AtCEP2 is  
168 primarily targeted to the ER compartment in root trichoblasts. We cannot rule out the  
169 possibility of a low level of an apoplast AtCEP2 expression. To analyse the expression of *AtCEP3*,  
170 we used a promoter fragment of 2-0Kb to drive GFP expression. *AtCEP3pro::GFP* fluorescence  
171 was also high in root trichoblasts, although not specific to this root epidermal cell-type (**Figure**  
172 **1A-B; Figure S1**). However, the specific expression of AtCEP1 and AtCEP2 in root trichoblast  
173 cells and the expression of AtCEP3 **in the epidermis** indicates that these genes may play a role  
174 in growth of these specialized cells. To address if they are involved in RH polar growth we  
175 isolated T-DNA mutants for all three *AtCEP* genes (**Table S2** and **Figure 1C; Figure S2**). We  
176 characterized at least two T-DNA alleles for each *AtCEP* gene. **Single mutants for *AtCEP1*,**  
177 ***AtCEP2* and *AtCEP3* showed similar phenotype to Wt Col-0 (Figure S2)** while the double mutants  
178 *atcep1-3 atcep3-2* and *atcep1-3 atcep2-2* showed increased RH growth (up to 20% longer)  
179 when compared to Wt Col-0 (**Figure 1D**). These suggested that all three AtCEPs, AtCEP1-AtCEP3,  
180 redundantly restrict RH growth. Together, these results indicate that Arabidopsis AtCEP1-  
181 AtCEP3 proteins are expressed in RHs where they negatively regulate RH cell growth.

182 NAC1 was previously identified as a regulator of lateral root development and *de novo* root  
183 organogenesis (Xie et al., 2000; Chen et al., 2016). Since NAC1 was shown to control *AtCEP1*  
184 and *AtCEP2* expression during *de novo* root organogenesis (Chen et al. 2016), we tested if a  
185 similar regulation could be taking place in RHs. Indeed, *in silico* analysis (eFP browser and Root  
186 Cell Atlas) and characterization of a *NAC1pro::GFP* reporter line supports that *NAC1* is highly  
187 expressed in root trichoblasts, specifically in the later stages of their development (**Figure 3A-**  
188 **B; Figure S3**). Moreover, a *nac1-2* null mutant displays significantly longer RHs than Wt plants  
189 (**Figure 3B**). In addition, when we expressed *NAC1* fused to the repression domain SRDX  
190 (Hiratsu et al., 2003) to specifically suppress the expression of *NAC1* target gene (35Spro::*NAC1*-  
191 SRDX-1 and 35Spro::*NAC1*-SRDX-2 lines) we observed an elongated RH phenotype (**Figure 3B**).  
192 Then, to analyse if *NAC1* overexpression would trigger a direct effects on RH growth possibly



193 by upregulation of AtCEP1/AtCEP2, we used the pER8:3pro::xFLAG-NAC1  $\beta$ -estradiol-inducible  
194 line (Zuo et al., 2000). In the presence of estradiol, an 75-fold induction of *NAC1* levels was  
195 observed (**Figure S4**). We then tested if the transcription factor NAC1 activates *AtCEP1-AtCEP3*  
196 expression **by several folds** in developing roots, as was shown for *de novo* adventitious root  
197 formation assay (Chen et al. 2016). The estradiol-inducible NAC1-FLAG line increased *CEP1*  
198 expression by 1.6 folds and *CEP2* by 4-folds while no changes were detected for *CEP3*. (**Figure**  
199 **S4**). On the contrary, the *nac1-2* mutant showed lower levels of transcripts of all three AtCEPs,  
200 AtCEP1-AtCEP3 (**Figure 3C**). Together, these results indicate that NAC1 activates the expression  
201 of *AtCEP1-AtCEP3*, and in consequence, controls RH growth, possibly through their EXT-  
202 processing activity. **To determine if NAC1 controls the expression of *AtCEP* genes by direct**  
203 **binding to their promoter regions, we searched for putative NAC-binding sites in open**  
204 **chromatin regions, according to publicly available ATAC-Seq datasets (Maher et al., 2018).**  
205 **According to CHIP-qPCR using pER8:3pro::xFLAG-NAC1 plants (60x induction) and anti-FLAG**  
206 **antibodies, *AtCEP1*, *AtCEP2*, and to a lower extent *AtCEP3*, all appeared as direct targets (**Figure****  
207 **3D), as revealed in comparison to the previously identified direct target *E2Fa* (Xie et al. 2023).**  
208 **All together, this confirms that NAC1 controls the expression of all three CEPs, *AtCEP1*, *AtCEP2*,**  
209 **and *AtCEP3* impacting on RH growth.**

210 In previous studies, AtCEPs were shown to be involved in the processing of EXT proteins  
211 (Greenwood et al., 2005; Helm et al., 2008; Hierl et al., 2012). We thus tested if the reduction  
212 of AtCEP activity in the mutants had an effect on the EXTs secreted and insolubilized in the RH  
213 cell walls. To this end, we used an EXT-reporter carrying a tdTomato tag (SS-TOM-Long-EXT)  
214 that is resistant to the acidic pH, characteristic of cell wall apoplast (**Figure 4A**). Importantly,  
215 expression of the reporter did not **affect** the polar growth of RHs (Martinez Pacheco et al. 2022),  
216 making it an ideal probe for monitoring *in situ* alterations in the arrangement of cell wall EXTs.  
217 We measured the cell wall fluorescence signal from the SS-TOM-Long-EXT construct **and its**  
218 **controls the SS-TOM construct** in the apical zones of RHs under plasmolysis. Plasmolysis allowed  
219 us to retract the plasma membrane and detect the EXT-signal coming specifically from the cell  
220 walls. Interestingly, cell wall stabilization/insolubility of SS-TOM-Long-EXT in the RH tip was  
221 drastically reduced in *cep1 cep3* double mutant when compared to Wt Col-0 plants. **To test if**  
222 **the total expression of the SS-TOM-Long-EXT construct was similar in both genetic backgrounds**  
223 **(Wt Col-0 vs *atcep1-3 atcep3-2* double mutant) without plasmolysis treatment, the overall**  
224 **signal was quantified (**Figure 4B**) and an overall higher signal was detected in *cep1 cep3* double**  
225 **mutant than in Wt Col-0 root hairs. These results suggest that** the SS-TOM-Long-EXT reporter  
226 tested in the apical zone of the RHs is differentially modified by deficient AtCEPs activities  
227 possibly during the EXT processing in the secretory pathway.

228 Since EXTs insolubilization in the cell walls of growing RHs is regulated by several factors  
229 including the Reactive Oxygen Species (ROS) homeostasis (Martinez Pacheco et al. 2022; Marzol  
230 et al. 2022), we tested if the effect of these AtCEPs might affect global ROS levels. We measured  
231 total cytoplasmic ROS ( $_{\text{cyt}}\text{H}_2\text{O}_2$ ) with the hydrogen peroxide-selective dye Peroxy-Orange 1  
232 (PO1), as a permeable boronate-based dye that is non-fluorescent in its reduced form, but

233 becomes fluorescent when irreversibly oxidized by H<sub>2</sub>O<sub>2</sub> (Dickinson et al., 2010). Apoplastic ROS  
234 (<sub>apo</sub>H<sub>2</sub>O<sub>2</sub>) levels were determined in the RH tips with the cell-impermeable Amplex™ UltraRed  
235 Reagent (Mangano et al. 2016; Matinez-Pacheco et al. 2022; Marzol et al. 2022) (**Figure 4B**).  
236 The *atcep1-3 atcep3-2* showed higher levels of <sub>apo</sub>H<sub>2</sub>O<sub>2</sub> in RH tips compared to Col-0, whereas  
237 the <sub>cyt</sub>H<sub>2</sub>O<sub>2</sub> were similar in both genotypes. This indicates that ROS homeostasis is also changed  
238 in the *ceps* mutant background, which can also affect the EXTs insolubilization in the cell walls.  
239 **Changes in ROS homeostasis in apoplastic and cytoplasmic apical areas were also detected in**  
240 **overgrowing root hairs when apoplastic type-III peroxidases (PRXs) related to EXTs were**  
241 **overexpressed (Marzol et al. 2022; Pacheco et al. 2022). This may imply a close relationship**  
242 **between the proper status of processed EXTs in the cell walls, ROS homeostasis in the apical**  
243 **zone and balanced root hair growth as previously hypothesised (Mangano et al. 2018).**

244 Finally, to test if AtCEP1-AtCEP3 might be able to interact with single-chain EXTs, we performed  
245 homology **modelling** with one cysteine endopeptidase of RcCysEP and a cysteine protease from  
246 *Ambrosia artemisiifolia* (pdb 1S4V and 5EF4 respectively) known to be able to cleave and  
247 process EXT-like substrates under *in vitro* conditions. AtCEP1-AtCEP3 proteins share a sequence  
248 identity of 66-74% with the most well-characterized *Ricinus communis* RcCysEP (**Figure S5**). By  
249 *docking* analysis, we obtained interaction energies (Kcal/mol) for all three AtCEPs proteins and  
250 they were compared to RcCysEP 1SV4. We analyzed docking with four different short EXT  
251 peptides from non-hydroxylated to fully *O*-glycosylated peptide (**Velasquez et al. 2015; Marzol**  
252 **et al. 2022**) (**Figure S6**). It was previously shown that mutants carrying under-*O*-glycosylated  
253 EXTs and related EXT-proteins have severe defects in RH growth (Velasquez et al. 2011;  
254 Velasquez et al. 2015). Our docking results for these three AtCEPs showed consistent  
255 interaction energy differences that depend on the EXT glycosylation state, being higher for non-  
256 *O*-glycosylated species. In general, we observed higher interaction energies (higher negative  
257 values) for (non)-hydroxylated EXT species than for *O*-glycosylated EXT variants. When we  
258 compared interaction energies among different AtCEPs interacting with EXT substrates, we  
259 observed that AtCEP1 and AtCEP3 displayed the highest interaction activity with the (non)-  
260 hydroxylated EXT species (**Figure S6**). Overall, this likely indicates that AtCEP1 and AtCEP3 might  
261 interact with EXT substrates and possibly catalyse proteolysis in open regions of the EXT  
262 backbones with little or no *O*-glycosylation while CEP2 might prefer *O*-Glycosylated regions.  
263 This is in agreement with previous studies suggesting that high levels of *O*-glycosylation in  
264 certain proteins physically restrict its degradation or processing.

265

## 266 **Conclusions**

267 It was previously considered that up-regulation of AtCEPs was related to the processing of EXT  
268 since EXT promotes wound healing, and this might be a barrier for the emergence of  
269 regenerated root tips. Therefore, it was hypothesized that the NAC1-AtCEPs **antagonises** EXT-  
270 mediated wound healing, and this allows the emergence of regenerated root tips (Chen et al.



271 2016). However the overall results in our study suggest that NAC1 **directly activates *AtCEP1*,**  
272 ***AtCEP2* and *AtCEP3* expression**, which in turn represses polar-cell expansion in growing RHs. By  
273 a colocalization analysis with several subcellular markers, we detected AtCEP2 in ER-derived  
274 compartments but not in the apoplast. Based on our results, it is plausible that AtCEP1-AtCEP3  
275 could act together as components on the EXT and EXT-related protein quality control program  
276 and proper EXTs protein processing. So far there is no information regarding the existence of a  
277 quality control pathway for *O*-glycosylated proteins in the same manner to the well-known and  
278 conserved CNX (calnexin)/calreticulin lectins linked to ERAD (ER-associated degradation)-  
279 program (e.g. with OS9, HRD3/SEL1L components) as it happens for misfolded *N*-glycosylated  
280 proteins (Su et al. 2011; Su et al. 2012; Strasser 2016). It is also unknown how the *O*-  
281 glycosylation machinery required for a proper processing of EXTs and EXT-related proteins in  
282 the secretory pathway (Velásquez et al. 2012; Marzol et al. 2018) are coordinated and  
283 controlled. Our findings pave the way for the discovery of novel functions for AtCEPs in cells  
284 that are not undergoing PCD but are characterized by extensive cell wall expansion or  
285 remodelling, possibly as a result of EXTs cleavage. The involvement of a protease in cell wall  
286 remodelling indicates the significance of the protein component of the cell wall in this process.  
287 Insights into the underlying mechanisms, such as the membrane fusion of ricinosomes with the  
288 plasma membrane during root development, similar to other ER-derived vesicles, will be  
289 intriguing **hypotheses** to investigate. Recently, a vacuolar processing enzyme ( $\beta$ VPE) was found  
290 to control the maturation of AtCEP1 transforming this pro-protease into mature protease while  
291 in *vpe* mutants, the maturation of AtCEP1 and other proteases was severely inhibited (Cheng  
292 et al. 2020). It is still unclear if VPE may be also acting in root trichoblasts to control AtCEPs  
293 processing. Root trichoblasts provide an excellent model system to dissect the molecular  
294 components of the AtCEPs-EXT *O*-glycosylation pathway required for polar-growth. **Finally, in**  
295 **our work we found that misregulation of EXT processing by CEPs enhances root hair growth**  
296 **while previously we found that enhancing the expression of type-III apoplastic Peroxidases**  
297 **PRX44/PRX73 (Marzol 2023) and PRX62 (Pacheco et al. 2022) also ends up in a similar root hair**  
298 **phenotype. Overall, it seems that subtle changes in EXTs processing and crosslinking has a direct**  
299 **effect on root hair growth as previously demonstrated for the impact of proline-hydroxylation**  
300 **and *O*-Glycosylation status of EXTs in plant cell growth (Velasquez et al. 2011, 2015). Currently,**  
301 **one of the main obstacles in the study of these complex glycoproteins is to visualise the**  
302 **chemical changes occurring in EXTs (proline hydroxylation, *O*-glycosylation, oligomerization and**  
303 **tyr-crosslinking) while they are being synthesized and then secreted *in situ* in the cell walls in**  
304 **an *in vivo* conditions.**

## 305 **Experimental Procedures**

306 **Plant and Growth Conditions.** *Arabidopsis thaliana* Columbia-0 (Col-0) was used as the Wt  
307 genotype in all experiments. All mutants and transgenic lines tested are in this ecotype.  
308 Seedlings were germinated on agar plates in a Percival incubator at 22°C in a growth room with  
309 16h light/8h dark cycles for 7-10 days at 140  $\mu\text{mol m}^{-2}\text{s}^{-1}$  light intensity. Plants were transferred  
310 to soil for growth under the same conditions as previously described at 22°C. For identification  
311 of T-DNA knockout lines, genomic DNA was extracted from rosette leaves. Confirmation by PCR  
312 of a single and multiple T-DNA insertions in the target AtCEP and NAC genes were performed  
313 using an insertion-specific Lb1 or Lb1.3 (for SALK lines) or Lb3 (for SAIL lines) primer in  
314 addition to one gene-specific primer. To ensure gene disruptions, PCR was also run using two  
315 gene-specific primers, expecting bands corresponding to fragments larger than in Wt. In this  
316 way, we isolated homozygous lines (for all the genes mentioned above). Mutant list is detailed  
317 in **Supplementary Table S1**. Lines expressing AtCEP2pro::pre-pro-3xHA-mCherry-AtCEP2 were  
318 crossed with ER and Golgi marker lines to obtain the double transgenic AtCEP2 + organelle  
319 marker.

320 **Root Hair Phenotype.** Seeds were surface **sterilised** and stratified in darkness for 3 d at 4°C and  
321 they were grown *in vitro* on a specific condition and medium in a plant growth chamber in  
322 continuous light (120  $\mu\text{mol s}^{-1}\text{m}^{-2}$ ) at 22°C. The quantitative analyses of RH phenotypes of Col-  
323 0 and transgenic lines were made the last day of the growth conditions described in the two  
324 previous sections. Images were captured using an Olympus SZX7 Zoom Stereo Microscope  
325 (Olympus, Tokyo, Japan) equipped with a Q-Colors digital camera and Q CAPTURE PRO 7  
326 software (Olympus). Results were expressed as the mean SD using the GRAPHPAD PRISM 8.0.1  
327 (GraphPad Software, Boston, MA, USA) statistical analysis software. Results are representative  
328 of three independent experiments, each involving 15–20 roots.

329 **AtCEP imaging.** Root hairs were ratio imaged with the Zeiss LSM 510 laser scanning confocal  
330 microscope (Carl Zeiss) using a 40X oil-immersion, 1.2 numerical aperture objective. EGFP (473–  
331 505nm) and mCherry (526–536 nm) emissions were collected using a 458-nm primary dichroic  
332 mirror and the Meta-detector of the microscope. Bright-field images were acquired  
333 simultaneously using the transmission detector of the microscope. For time-lapse analysis,  
334 images were collected every 3 or 5 s. Image sequences were analyzed using the Template  
335 Matching and Slice Alignment plug-in for ImageJ. Fluorescence intensity was measured in 7  $\mu\text{m}$   
336 ROI at the RH apex.

337 **Transcriptional reporter generation.** Vectors based on the Gateway cloning technology  
338 (Invitrogen) were used for all manipulations. Promoter regions (2Kb) were PCR-amplified with  
339 AttB recombination sites. PCR products were first recombined in pDONOR207 and transferred  
340 into pMDC111. Transgenic lines used in this study are described in **Table S2**.

341 **AtCEPs expression.** To quantify AtCEP1 and AtCEP2 expression levels, lines AtCEP1pro::3xHA-  
342 EGFP AtCEP2pro::3xHA-mCherry were used. The fluorescence intensity of GFP and mCherry  
343 was measured respectively. All RHs growth stages were measured. Ten days old seedlings were  
344 removed from the medium and placed in a slide containing a drop of liquid MS 0.5X in the dark,  
345 and images were obtained using a Zeiss Imager A2 epifluorescence microscope. The objective  
346 used was 10X, 0.3 numerical aperture, exposure time 2 seconds. The lasers used were suitable  
347 for each fluorophore: GFP (GFP  $\lambda$  max ex. = 488 nm,  $\lambda$  max em. = 507 nm) and mCherry ( $\lambda$  max  
348 ex. = 536 nm,  $\lambda$  max em. = 632 nm) The Wt Col-0 line was used to rule out autofluorescence  
349 noise. The images were analyzed using ImageJ 1.50b software. To measure fluorescence  
350 intensity levels (represented in arbitrary units: UA), both a circular region of interest within the  
351 RH apex (ROI) and the total area of RH were selected. All RHs from 6 seedlings were analyzed.  
352 The reported values are the mean  $\pm$  standard error (mean  $\pm$  SEM).

353 **Subcellular localization of AtCEP2.** Lines expressing CEP2pro:pre-pro-3xHA-mCherry-CEP2  
354 were crossed with ER and Golgi marker lines to obtain the double transgenic CEP2 + organelle  
355 marker. Co-localization analysis was performed using the BIOP implementation (Battistella et  
356 al. 2019) of the JACoP-plugin (Bolte and Cordelières 2006) in ImageJ (1.53t) on individual root  
357 hairs for which ROIs (Region Of Interest) were drawn manually. Background intensity was  
358 subtracted from each channel as the mean intensity of the autofluorescence control + 2SD.  
359 Different marker expression levels excluded the usage of fixed cutoff values for all images, so  
360 the histogram-derived Otsu method was chosen based on visual inspection of the thresholded  
361 images for both channels. To compare the relative localization of CEP2pro:pre-pro-3xHA-  
362 mCherry-CEP2 (Ch2) in each of the different subcellular compartments (Ch1), we used  
363 Mander's M2 overlap coefficient (Manders et al. 1993) to measure the proportion of positive  
364 pixels in Ch2 that co-occur with positive pixels in Ch1. Confocal microscopy images were  
365 acquired on a Zeiss LSM710 microscope with an EC Plan-Neofluar 40x/1.30 oil objective. Images  
366 were acquired sequentially on different tracks in order to avoid excitation and emission bleed-  
367 through using the following emission ranges for the individual channels (8-bit pixel depth): Ch1  
368 519–589 nm, Ch2 594-690 nm. Pixel size was set at 100 nm following Nyquist sampling criterion  
369 and pinhole was adjusted to obtain a 3.6  $\mu$ m thick optical slice. For each experimental replicate,  
370 15-25 total individual root hairs from five different plants per subcellular compartment marker  
371 were imaged.

372 **Chromatin immunoprecipitation Assay.** Chromatin immunoprecipitation (ChIP) assays were  
373 performed on pER8:3xFLAG-NAC1 plants (Chen et.al 2016, DOI: 10.1104/pp.15.01733) mainly  
374 as described in Ariel et al. (2020). Plants were grown for 10 days in plates containing MS 0,5X  
375 medium (pH 5,7; 0.8% agar) placed vertically in a culture chamber at 22°C and continuous light  
376 (140 $\mu$ mol/m<sup>2</sup>.sec). After 10 days, the plates were placed horizontally and treated with  $\beta$ -  
377 estradiol 10  $\mu$ M solution for 3h. The expression of NAC1 was checked by qPCR (supplementary  
378 table Sx). Chromatin was cross-linked with formaldehyde 1% for 10 min at room temperature.  
379 Cross-linking was stopped by adding glycine (125 mM final concentration) and incubating for  
380 10 min at room temperature. Crosslinked chromatin was extracted by cell resuspension,

381 centrifugation, cell membrane lysis, and sucrose gradient as previously described (Ariel et al.,  
382 2020). Nuclei were resuspended in Nuclei Lysis Buffer and chromatin was sonicated using a  
383 water bath Bioruptor Pico (Diagenode; 30 s on / 30 s off pulses, at high intensity for 10 cycles).  
384 Chromatin samples were incubated for 12 h at 4 °C with Protein G Dynabeads (Invitrogen)  
385 precoated with the antibodies anti-FLAG (Abcam ab18230) or anti-IgG (Abcam ab6702) as a  
386 negative control. Immunoprecipitated DNA was recovered using Phenol:Chloroform:Isoamyl  
387 Acid (25:24:1; Sigma) and analyzed by qPCR using the primers listed in **Supplementary Table**  
388 **S3**. Two regions upstream of the E2Fa gene were used as a positive control (Xie and Ding, 2022).  
389 Untreated sonicated chromatin was processed in parallel and considered the input sample. The  
390 GraphPad Prism 6 software was used to analyze the data and produce the graphs.

391 **Apoplasmic and cytoplasmic ROS measurements.** To measure ROS levels in root trichoblasts, 8  
392 days-old Arabidopsis seedlings grown in continuous light were used. For cytoplasmic ROS, the  
393 seedlings were incubated in darkness for 10 min with H<sub>2</sub>O<sub>2</sub> and were visualized with Peroxy-  
394 Orange 1 (PO1). PO1 was dissolved in DMSO to make a 500 µM stock and was further diluted  
395 in water to make a 50 µM working solution. Seedlings were incubated in PO1 for 15 min in the  
396 dark and were then rinsed with water and mounted in water for imaging and observed with  
397 Zeiss Imager A2 Epifluorescence Microscope (Zeiss, Germany) (Plain Apochromat 40X/1.2 WI  
398 objective, exposure time 25 ms). Images were analyzed using ImageJ software. To measure ROS  
399 levels, a circular region of interest was chosen in the zone of the RH tip cytoplasm. To measure  
400 apoplasmic ROS, the seedlings were incubated with 50 µM Amplex™ UltraRed Reagent (AUR)  
401 (Molecular Probes, Invitrogen) for 15 min in darkness and rinsed with liquid 0.5X MS media  
402 (Duchefa, Netherlands). Root hairs were imaged with a Zeiss LSM5 Pascal (Zeiss, Germany))  
403 laser scanning confocal microscope (Excitation 543 nm argon laser; Emission: 560–610 nm,  
404 Plain Apochromat 40X/1.2 WI objective). Quantification of the AUR probing fluorescence signal  
405 was restricted to apoplasmic spaces at the RH tip and quantified using the ImageJ software.  
406 Fluorescence AU were expressed as the mean ± SD using the GraphPad Prism 8.0.1 (USA)  
407 statistical analysis software. Results of both ROS measurements are representative of two  
408 independent experiments, each involving 10–15 roots and approximately, between 10-20 RHs  
409 per root were observed.

410 **Treatments with β-Estradiol.** β-Estradiol (Sigma-Aldrich,) was added to 0.5X MS media at a final  
411 concentration of 10 µM. The line ER8pro::3×FLAG-NAC1 was grown at 22°C for 4 days + 3 days  
412 of β- Estradiol induction. Root hairs phenotype was then quantified **as indicated before**.

413 **Quantitative reverse transcriptase PCR (qRT-PCR).** Total RNA was isolated from 10-d-old  
414 seedling roots (40 for each line) using the RNeasy Plant Mini Kit (Qiagen, Germany). cDNA was  
415 synthesized using TOPscript™ RT DryMIX (dT18, Enzynomics, Korea). qRT-PCR analyses were  
416 performed using TOPreal™ qPCR 2x PreMIX (SYBR Green, Enzynomics, Korea) and Chromo4™  
417 Four-Color Real-Time Detector (Bio-Rad, USA). Gene-specific signals were normalized relatively  
418 to *PP2A* (At1G69960) signals. Each qRT-PCR reaction was performed in triplicate, and each

419 experiment was repeated three times using independent preparations of RNA. Primers used  
420 are as listed in **Table S3**.

421 **SS-TOM and SS-TOM-Long-EXT constructs.** These construct were described in detil in Martinez  
422 Pacheco et al. 2022. Briefly, The secretory sequence (SS) from tomato polygalacturonase is  
423 MVIQRNSILLIIIFASSISTCRSGT (2.8 kDa) and the EXT-Long sequence is  
424 BAAAAAACTLPSLKNFTFSKNIFESMDETCRPSESKQVKIDGNENCLGGRSEQRTEKECFPVVSKPVDCSK  
425 GHCGVSREGQSPKDPKTVTPPKPSTPTTPKPNPSPPPKTLPPPKTSPPPPVHSPPPPVASPPPPVHSP  
426 PPPVASPPPPVHSPPPPVASPPPPVHSPPPVASPPPPVHSPPPVHSPPPVASPPPPVHSPPPVHSP  
427 PPVHSPPPVHSPPPVHSPPPVASPPPPVHSPPPVHSPPPVHSPPPVHSPPPVASPPPPVHSPPPPPVASPP  
428 PPVHSPPPVASPPPPVHSPPPVASPPPPVHSPPPVHSPPPVHSPPPVHSPPPVASPPALVFSPPPPVHSPPP  
429 PAPVMSPPPPTFEDALPPTLGLSYASPPPIFQGY\* 395–(39.9 kDa). The predicted molecular size for  
430 SS-TOM protein is 54.2 kDa and for SS-TOM-EXT-Long Mw is 97.4 kDa.

431 **Modelling and molecular docking between AtCEP1-AtCEP3 and EXTs.** Modelling and molecular  
432 docking: cDNA sequences of AtCEPs were retrieved from TAIR (AtCEP1: AT1G05240, AtCEP2:  
433 AT3G50990, AtCEP3: AT4G26010) and NCBI Nucleotide DB. Homology **modelling** was  
434 performed using an AtCEP from *Ricinus communis* and from *Ambrosia artemisiifolia* using  
435 modeller 9.14 (Sali et al. 1993), using the crystal structures 1S4V and 5EF4 as templates,  
436 available at the protein data bank. 100 structures were generated for each protein and the best  
437 scoring one (according to DOPE score) was picked. The *receptor* for the docking runs was  
438 generated by the prepare\_receptor4 script from the autodock suite, adding hydrogens and  
439 constructing bonds. Peptides based on the sequence PYYSPSPKVYYPPSSVYPPPPS were used,  
440 replacing proline by hydroxyproline, and/or adding *O*-Hyp glycosylation with up to four  
441 arabinoses per hydroxyproline in the fully glycosylated peptide and a galactose on the serine,  
442 as it is usual in plant *O*-Hyp (Strasser 2016). Ligand starting structure was generated as the most  
443 stable structure by molecular dynamics (Velasquez et al. 2015a). All ligand bonds were set to  
444 be able to rotate. Docking was performed in two steps, using Autodock vina (Trott et al. 2010).  
445 First, an exploratory search over the whole protein surface (exhaustiveness 4) was done,  
446 followed by a more exhaustive one (exhaustiveness 8), reducing the search space to a 75x75x75  
447 box centered over the most frequent binding site found in the former run.

448 **Acknowledgements**

449 We thank ABRC (Ohio State University) for providing T-DNA lines seed lines and Gietl for  
450 providing some of the materials used in this study. J.M.E. is **an investigator** of the National  
451 Research Council (CONICET) from Argentina. This work was supported by grants from ANPCyT  
452 (PICT2019-00015 and PICT2021-0514 to J.M.E and PICT2018-00577 to E.M.) and from the  
453 Spanish Ministry of Science and Innovation MCIN/AEI/10.13039/501100011033 and FEDER  
454 “una manera de hacer Europa” (PID2021-128078NB-I00 to E.R.). In addition, this research is  
455 also funded by ANID – Programa Iniciativa Científica Milenio ICN17\_022, NCN2021\_010 and  
456 Fondo Nacional de Desarrollo Científico y Tecnológico [1200010] to J.M.E. The authors  
457 gratefully acknowledge the Microscopy and Imaging Facility at the Leloir Institute Foundation  
458 (FIL) for their support and assistance in the present work.

459

460

461 **Author Contribution**

462 D.R.G performed all the experiments and analyzed the data. E.M **isolated cep mutants** and  
463 analyzed the data. Y.d.C.R. performed ROS experiments. A.H.R and E.A.M. carried out co-  
464 localization studies. A.A.A. and A.D.N. carried out the molecular modeling of AtCEPs-EXTs. **L.F**  
465 **and F.A. carried out the ChIP experiment and analyzed the data.** J.M. P., M.C., V.B.G., L.E.L,  
466 G.D.D. **and C.B.** analyzed the data. L.X., E.R and J.J.S.S. provided materials, analyzed the co-  
467 localization data and wrote the paper. E.R. wrote the paper. J.M.E. designed research, analyzed  
468 the data, supervised the project, and wrote the paper. All authors commented on the results  
469 and the manuscript. This manuscript has not been published and is not under consideration for  
470 publication elsewhere. All the authors have read the manuscript and have approved this  
471 submission.

472

473

474 **Competing financial interest**

475 The authors declare no competing financial interests. Correspondence and requests for  
476 materials should be addressed to J.M.E. (Email: [jestevez@leloir.org.ar](mailto:jestevez@leloir.org.ar)).



477

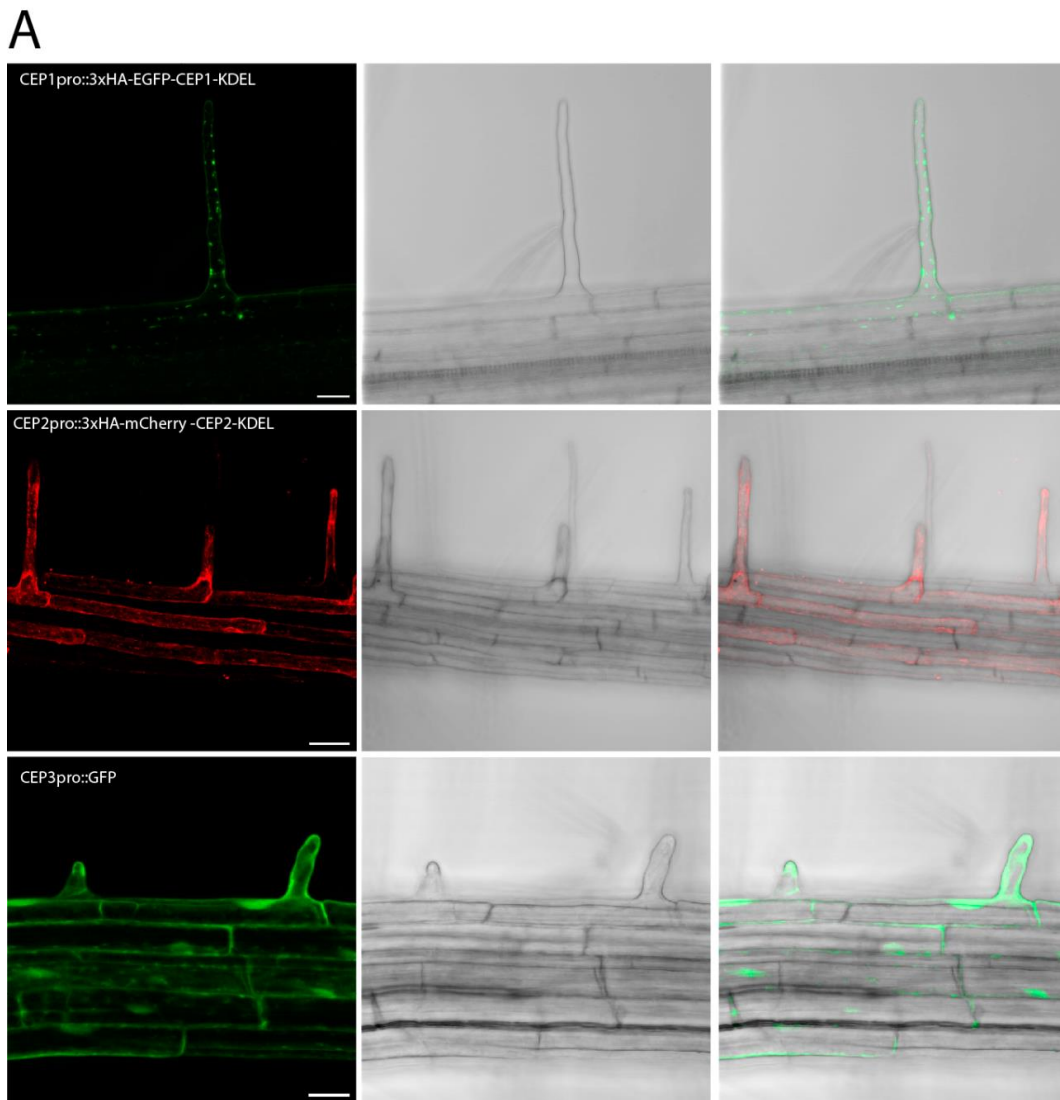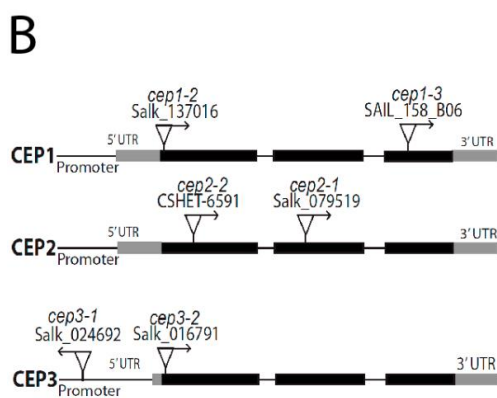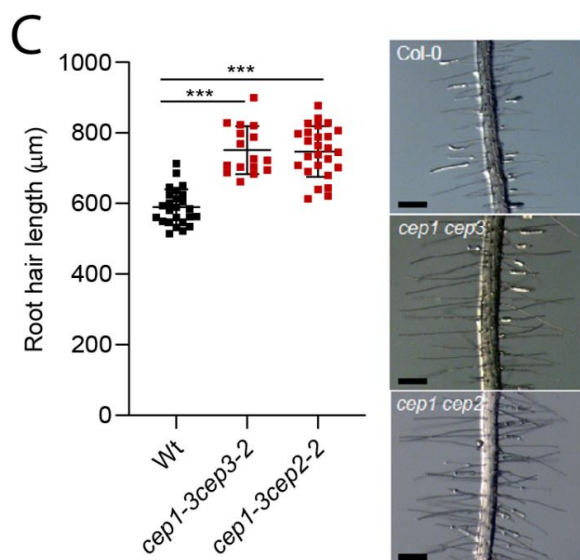

478

479 **Figure 1. AtCEP1, AtCEP2 and AtCEP3 are expressed in root hairs and negatively regulate root**

480 **hair growth. (A) AtCEP1 and AtCEP2 are expressed in root trichoblasts. Translational reporters**

481 for AtCEP1 (AtCEP1pro::PRE-PRO-GFP-KDEL) and AtCEP2 (AtCEP2pro::PRE-PRO-mCherry-  
482 AtCEP2-KDEL). AtCEP3 are expressed in both atricoblasts and tricoblasts. Transcriptional  
483 reporters of AtCEP3 (AtCEP3pro::GFP) in the root differentiation zone and specifically in RHs.  
484 Scale bar = 200  $\mu$ m. (In the left) confocal microscopy image, (in the center) bright field  
485 microscopy image and (in the right) merge of two. (B) Scheme of AtCEP1, AtCEP2 and AtCEP3  
486 genes showing introns (thin lines), exons (rectangles) and positions of T-DNA insertions. (C)  
487 Quantitative analysis of RH length (mean  $\pm$  s.e.m., n= 200) in Wt Col-0 and *ceps* mutants. NS=  
488 not significant difference. Data are shown as the mean  $\pm$  SEM, (n=20). Asterisks indicate  
489 significant differences from the Wt according to an ANOVA test with  $p < 0.05$ . (On the right)  
490 Selected images of RHs in Wt and in single and double *cep* mutants. Scale bar = 200  $\mu$ m.

A

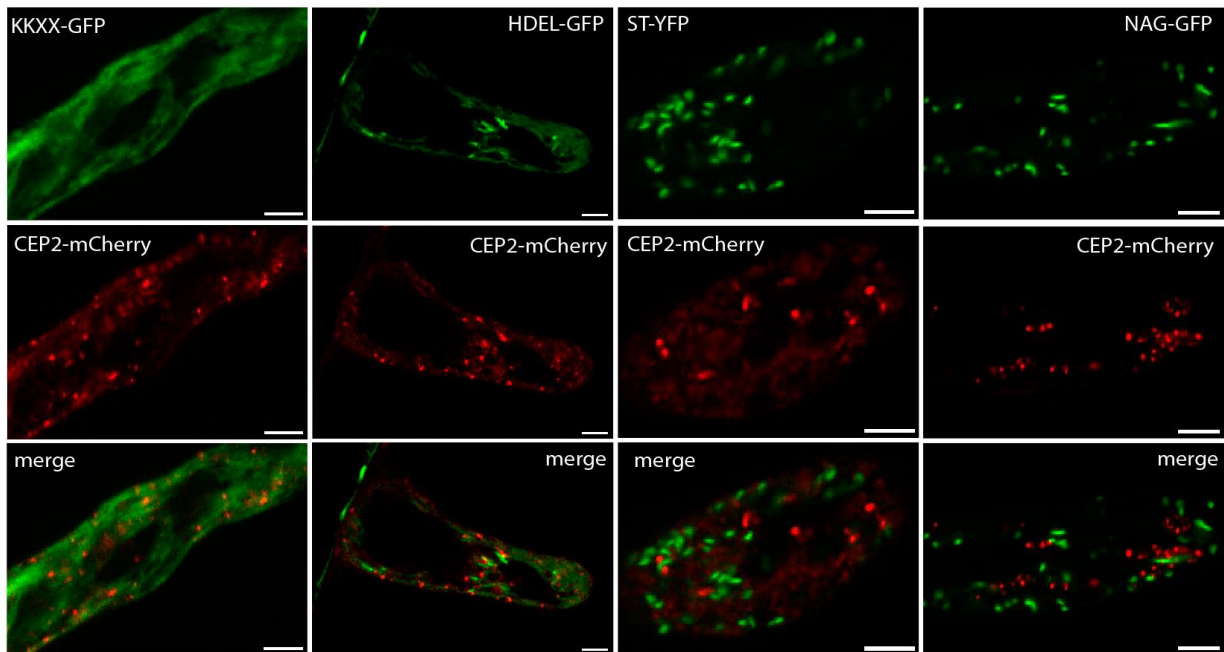

B

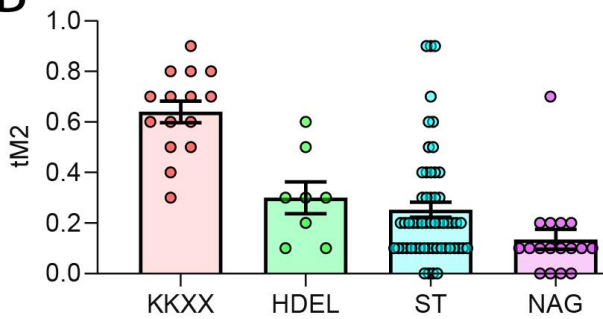

C

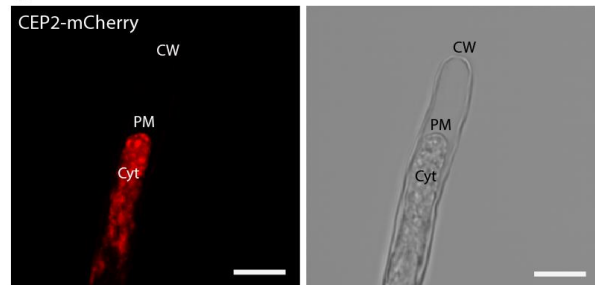

491  
492

493 **Figure 2. AtCEP2 colocalizes mostly with an ER-membrane marker and, to a lower extent, to**  
 494 **Golgi markers in root hair cells. (A)** Co-localization of AtCEP2-mCherry with markers for  
 495 different subcellular compartments. Seven-day-old AtCEP2mCherry seedlings were grown (n=  
 496 10 roots with 1–5 root hair cells each). HDEL-GFP is a Lumen Endoplasmic reticulum (ER) marker  
 497 and KKXX-GFP is an ER membrane marker. NAG-GFP is a cis-Golgi marker and ST-YFP is a trans-  
 498 Golgi network marker. Scale bar 5  $\mu$ m. **(B)** Quantification of colocalization using Manders  
 499 correlation coefficient. **(C)** Plasmolyzed root hair to show the lack of signal in the apoplastic  
 500 regions of AtCEP2-mCherry. Scale bar 20  $\mu$ m. (CW) Cell Wall; (PM) Plasma membrane; (Cyt)  
 501 Cytoplasm.

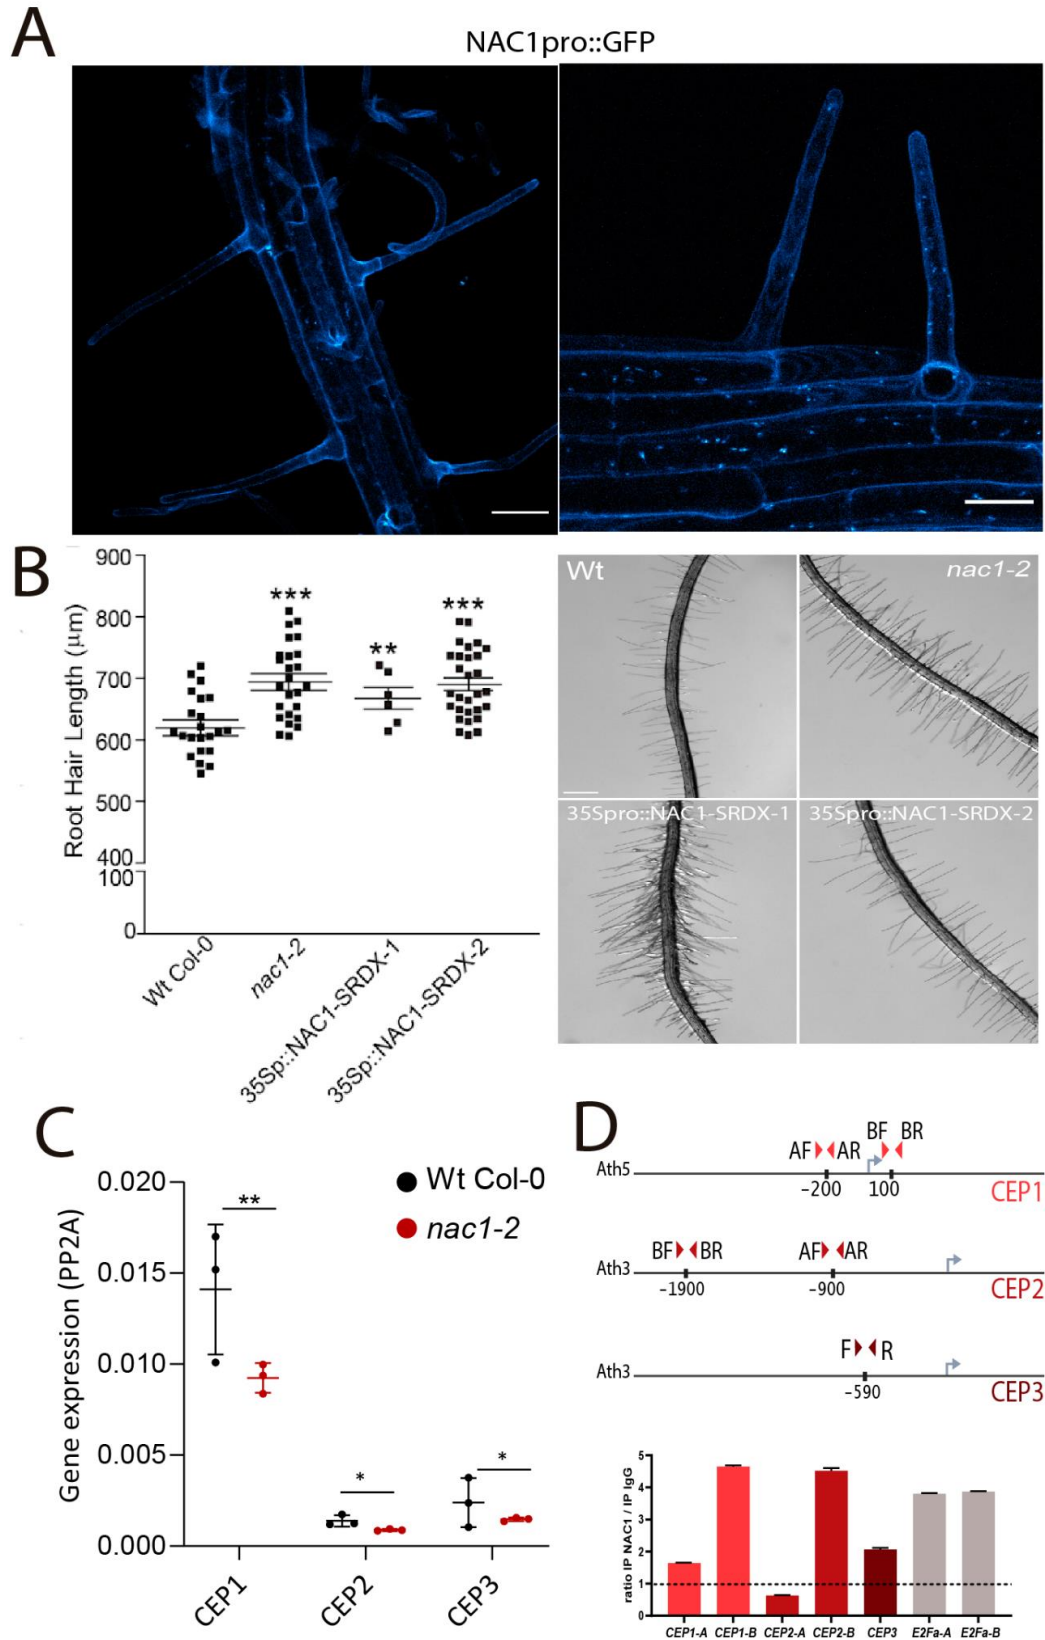

502  
503

504 **Figure 3. NAC1 is expressed and regulates root hair growth linked to AtCEP1-AtCEP3**  
505 **expression.** (A) NAC1pro:GFP expression in roots and RHs. (B) RH phenotype in *nac1-2* mutant  
506 and two constitutive negative NAC1 lines. Quantitative analysis of RH length (mean  $\pm$  s.e.m., n=

507 200). Data are shown as the mean  $\pm$  SEM, (n=20). Asterisks indicate significant differences from  
508 the Wt Col-0 according to an ANOVA test with  $p < 0.05$ . **(C)** qPCR analysis of AtCEP1, AtCEP2, and  
509 AtCEP3 in Wt Col-0 and *nac1-2* mutant. RNA was extracted from the roots of seedlings. *PP2A*  
510 was used as a control and amplification was performed for 30 cycles. Black arrowheads  
511 represent the region amplified by the primers used for the RT-PCR. Asterisks indicate significant  
512 differences from the Wt Col-0 according to an ANOVA test with (\*\*) $p < 0.01$  and (\*)  $p < 0.05$ . **(D)**  
513 ChIP-qPCR analysis of NAC1 binding to **AtCEP1, AtCEP2 and AtCEP3** promoter regions. Schemes  
514 of the loci showing the location of the fragments analyzed by ChIP-qPCR are shown in the upper  
515 part. Primers were designed analyzing ATAC-seq experiments in regions where the chromatin  
516 is accessible (Maher et al., 2018). The enrichment was measured relative to the negative control  
517 ACTIN.

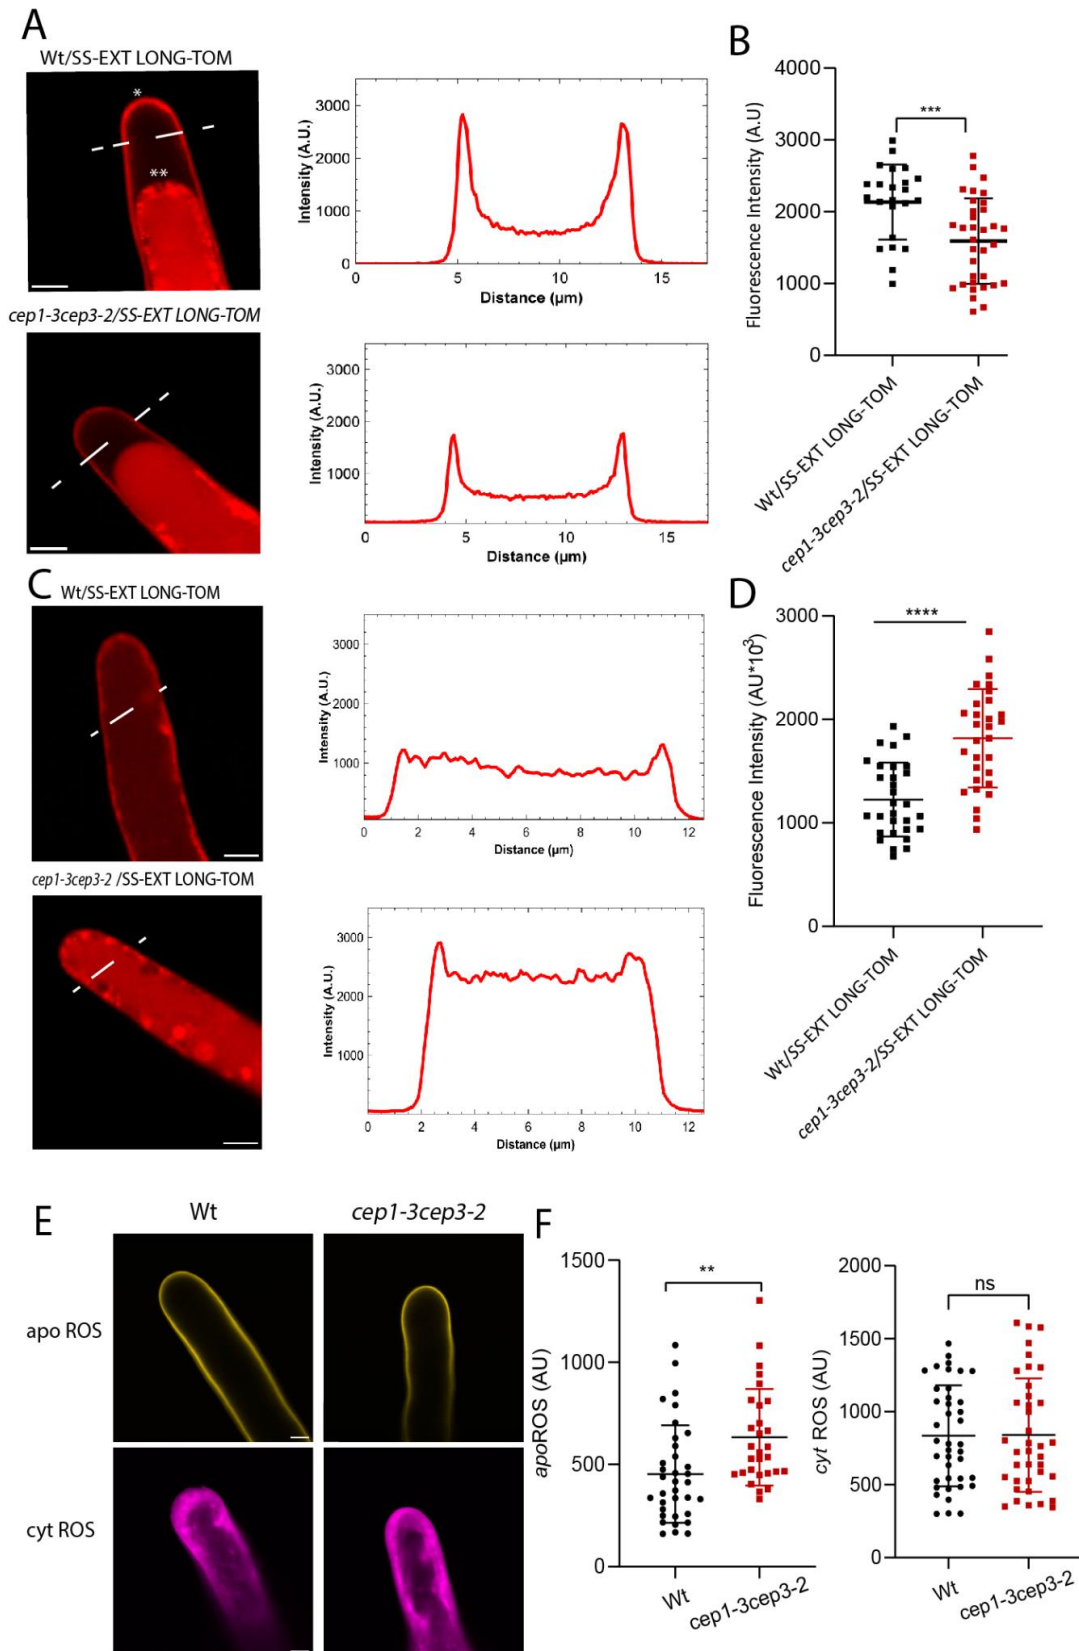

518

519 **Figure 4. EXT secretion/insolubilization and apoplasmic ROS are affected by AtCEP1-AtCEP3 in**  
 520 **root hairs. (A) Signal of SS-EXT LONG-TOM in the apical zone of RHs in the *cep1-3 cep3-2* double**  
 521 **mutant. Cells were plasmolyzed with a mannitol 8% solution. (On the left) Intensity profiles**



522 across a dotted line in the RH tips. **(B)** Each point in the graph is the signal derived from a single  
523 RH tip. Fluorescence AU data are the mean  $\pm$  SD (N = 3), two-way ANOVA followed by a  
524 Tukey–Kramer test; (\*\*\*)  $p < 0.01$ . Results are representative of two independent experiments.  
525 NS = non-significant differences. Scale bars = 5  $\mu$ m. **(C)** Signal of SS-EXT LONG-TOM in the apical  
526 zone of RHs in the *cep1-3 cep3-2* double mutant. (On the left) Intensity profiles across a dotted  
527 line in the RH tips. **(D)** Each point in the graph is the signal derived from a single RH tip.  
528 Fluorescence AU data are the mean  $\pm$  SD (N = 3), two-way ANOVA followed by a Tukey–  
529 Kramer test; (\*\*\*\*)  $p < 0.001$ . Results are representative of two independent experiments. NS =  
530 non-significant differences. Scale bars = 5  $\mu$ m. **(E)** Cytoplasmic ROS ( $_{\text{cyt}}\text{ROS}$ ) levels were  
531 measured using the hydrogen peroxide-selective dye Peroxy-Orange 1 (PO1) in apical areas of  
532 RHs in wild-type (Columbia Col-0) and in the double mutant *cep1-3 cep3-2*. Each point is the  
533 signal derived from a single RH tip. Fluorescence AU data are the mean  $\pm$  SD (N= 20 RHs), two-  
534 way ANOVA followed by a Tukey–Kramer test; (\*\*)  $p < 0.01$ . Results are representative of two  
535 independent experiments. Asterisks indicate significant differences. NS = non-significant  
536 differences. Scale bars = 2  $\mu$ m. **(F)** Apoplastic ROS ( $_{\text{apo}}\text{ROS}$ ) levels were measured with Amplex™  
537 UltraRed in apical areas of RHs in wild-type (Columbia Col-0) and in the double mutant *cep1-3*  
538 *cep3-2*. Each point in **(F)** is the signal derived from a single RH tip. Fluorescence AU data are the  
539 mean  $\pm$  SD (N =3), two-way ANOVA followed by a Tukey–Kramer test. Results are representative  
540 of two independent experiments. Scale bars = 2  $\mu$ m.

541 **REFERENCES**

- 542 Battistella C, Guet R, Burri O, Seitz A, Escrig S, Knott GW, Meibom A, Klok HA. (2019) Cellular  
543 Uptake and Intracellular Trafficking of Poly( N-(2-Hydroxypropyl) Methacrylamide).  
544 *Biomacromolecules*. 20(1):231-242. doi: 10.1021/acs.biomac.8b01372.
- 545 Baumberger N, Ringli C, Keller B. (2001). The chimeric leucinerich repeat/extensin cell wall  
546 protein LRX1 is required for root hair morphogenesis in *Arabidopsis thaliana*. *Genes &*  
547 *Development* 15, 1128–1139
- 548 Baumberger N, Steiner M, Ryser U, Keller B, Ringli C. (2003). Synergistic interaction of the two  
549 paralogous *Arabidopsis* genes LRX1 and LRX2 in cell wall formation during root hair  
550 development. *Plant Journal* 35, 71–81
- 551 Becker, C., Senyuk, V.I., Shutov, A.D., Nong, V.H., Fischer, J., Horstmann, C., and Müntz, K.  
552 (1997). Proteinase A, a storage globulin-degrading endopeptidase of vetch (*Vicia sativa*  
553 L.) seeds, is not involved in early steps of storage-protein mobilization. *Eur. J. Biochem.*  
554 248: 304–312
- 555 Beers, E.P., Woffenden, B.J., Zhao C. (2000). Plant proteolytic enzymes: possible role during  
556 programmed cell death. *Plant Mol. Biol.* 44, 399–415. doi: 10.1023/A:1026556928624
- 557 Berger F, Linstead P, Dolan L, Haseloff J. (1998) Stomata patterning on the hypocotyl of  
558 *Arabidopsis thaliana* is controlled by genes involved in the control of root epidermis  
559 patterning. *Dev Biol.* 194(2):226-34. doi: 10.1006/dbio.1997.8836.
- 560 Bolte S, Cordelières FP. (2006) A guided tour into subcellular colocalization analysis in light  
561 microscopy. *J Microsc.* 224(Pt 3):213-32. doi: 10.1111/j.1365-2818.2006.01706.x.
- 562 Borassi C, Sede AR, Mecchia MA, Salgado Salter JD, Marzol E, Muschietti JP, Estevez JM. (2016)  
563 An update on cell surface proteins containing extensin-motifs. *J Exp Bot.* 67(2):477-87.  
564 doi: 10.1093/jxb/erv455
- 565 Bucher M, Schroerer B, Willmitzer L and Riesmeier JW (1997) Two genes encoding extensin-like  
566 proteins are predominantly expressed in tomato root hair cells. *Plant Molecular Biology*  
567 (35), 497-508.
- 568 Bucher M, Brunner S, Zimmermann P, Zardi G, Amrhein N, Willmitzer L and Riesmeier JW (2002)  
569 The expression of an extensin-like protein correlates with cellular tip growth in tomato.  
570 *Plant Physiology* (128), 911-923.
- 571 Cannon MC et al (2008) Self-assembly of the plant cell wall requires an extensin scaffold. *Proc*  
572 *Natl Acad Sci USA* 105:2226–2231. doi:10.1073/pnas.0711980105
- 573 Chen X., Cheng J., Chen L., Zhang G., Huang, H., Zhang Y., Xu L. (2016) Auxin-independent NAC  
574 Pathway Acts in Response to Explant-Specific Wounding and Promotes Root Tip  
575 Emergence during *De Novo* Root Organogenesis in *Arabidopsis*. *Plant Physiol.*  
576 DOI:10.1104/pp.15.01733
- 577 Cheng Z, Guo X, Zhang J, Liu Y, Wang B, Li H, Lu H. (2020)  $\beta$ VPE is involved in tapetal degradation  
578 and pollen development by activating proprotease maturation in *Arabidopsis thaliana*. *J*  
579 *Exp Bot.* 25;71(6):1943-1955. doi: 10.1093/jxb/erz560
- 580 Fabrice T, Vogler H, Draeger C, Munglani G, Gupta S, Herger A, Knox P, Grossniklaus U,  
581 Ringli C. (2018). LRX Proteins play a crucial role in pollen grain and pollen tube cell wall  
582 development. *Plant Physiology* 176: 1981–1992
- 583 Doll NM, Berenguer E, Truskina J, Ingram G. *AtEXT3 is not essential for early embryogenesis or*  
584 *plant viability in Arabidopsis.* *New Phytol.* (2022) 236(5): 1629-1633. doi:  
585 10.1111/nph.18452.

- 586 Grebe M, Xu J, Möbius W, Ueda T, Nakano A, Geuze HJ, Rook MB, Scheres B. (2003) Arabidopsis  
587 sterol endocytosis involves actin-mediated trafficking via ARA6-positive early endosomes.  
588 *Curr Biol.* 13(16):1378-87. doi: 10.1016/s0960-9822(03)00538-4.
- 589 Greenwood JS, Helm M, Gietl C (2005) Ricinosomes and endosperm transfer cell structure in  
590 programmed cell death of the nucellus during Ricinus seed development. *Proc Natl Acad*  
591 *Sci USA* 102:2238–2243. doi:10.1073/pnas.0409429102
- 592 Grierson C, Nielsen E, Ketelaarc T, Schiefelbein J. Root hairs. (2014) *Arabidopsis Book*. 12:e0172.  
593 doi: 10.1199/tab.0172.
- 594 Hall Q, Cannon MC. (2002) The cell wall hydroxyproline-rich glycoprotein RSH is essential for  
595 normal embryo development in Arabidopsis. *Plant Cell.* 14(5):1161-72. doi:  
596 10.1105/tpc.010477
- 597 He, X., and Kermode, A.R. (2003). Proteases associated with programmed cell death of  
598 megagametophyte cells after germination of white spruce (*Picea glauca*) seeds. *Plant*  
599 *Mol. Biol.* 52: 729–744
- 600 Helm M et al (2008) KDEL-tailed cysteine endopeptidases involved in programmed cell death,  
601 intercalation of new cells, and dismantling of extensin scaffolds. *Am. J. Bot.* 95:1049–  
602 1062. doi:10.3732/ajb.2007404
- 603 Hierl G, Vothknecht U, Gietl C (2012) Programmed cell death in *Ricinus* and *Arabidopsis*: the  
604 function of KDEL cysteine peptidases in development. *Physiol Plant* 145:103–113.  
605 doi:10.1111/j.1399-3054.2012.01580.x
- 606 Hierl G, Howing T, Isono E, Lottspeich F, Gietl C (2014) Ex vivo processing for maturation of  
607 Arabidopsis KDEL-tailed cysteine endopeptidase 2 (AtCEP2) pro-enzyme and its storage  
608 in endoplasmic reticulum derived organelles. *Plant Mol Biol* 84:605–620.  
609 doi:10.1007/s11103-013-0157-6
- 610 Howing T, Huesmann C, Hoefle C, Nagel MK, Isono E, Huckelhoven R, Gietl C (2014) Endoplasmic  
611 reticulum KDEL-tailed cysteine endopeptidase 1 of Arabidopsis (AtCEP1) is involved in  
612 pathogen defense. *Front Plant Sci* 5:58. doi:10.3389/fpls.2014. 00058
- 613 Howing T, Dann M, Muller B, Helm M, Scholz S, Schneitz K, et al. (2018) The role of KDEL-tailed  
614 cysteine endopeptidases of Arabidopsis (AtCEP2 and AtCEP1) in root development. *PLoS*  
615 *ONE* 13(12): e0209407. <https://doi.org/10.1371/journal.pone.0209407>
- 616 Jackson, P.A., Galinha, C.I., Pereira, C.S., Fortunato, A., Soares, N.C., Amâncio, S.B., and Pinto  
617 Ricardo, C.P. (2001). Rapid deposition of extensin during the elicitation of grapevine callus  
618 cultures is specifically catalyzed by a 40-kilodalton peroxidase. *Plant Physiol.* 127: 1065–  
619 1076
- 620 Maher KA, Bajic M, Kajala K, Reynoso M et al. (2018) Profiling of Accessible Chromatin Regions  
621 across Multiple Plant Species and Cell Types Reveals Common Gene Regulatory Principles  
622 and New Control Modules. *Plant Cell* 30(1):15-36.
- 623 Manders EMM, Verbeek FJ, Aten JA. (1993) Measurement of co-localization of objects in dual-  
624 colour confocal images. *J Microsc.* 169(3):375-382. doi: 10.1111/j.1365-  
625 2818.1993.tb03313.x.
- 626 Mangano S, Martínez Pacheco J, Marino-Buslje C, Estevez JM. How Does pH Fit in with  
627 Oscillating Polar Growth? *Trends Plant Sci.* 2018 23(6):479-489. doi:  
628 10.1016/j.tplants.2018.02.008.
- 629 Martínez-Pacheco J, Ranocha P, Kasulin L, Fusari CM, et al. (2022) Apoplastic class III  
630 peroxidases PRX62 and PRX69 promote Arabidopsis root hair growth at low temperature.  
631 *Nat Commun.* 14;13(1):1310. doi: 10.1038/s41467-022-28833-4

- 632 Marzol E, Borassi C, Bringas M, Sede A, Rodríguez Garcia DR, Capece L, Estevez JM. (2018). Filling  
633 the Gaps to Solve the Extensin Puzzle. *Mol Plant*. 11(5):645-658
- 634 Marzol E, Borassi C, Carignani Sardoy M, Ranocha P et al. (2022) Class III Peroxidases PRX01,  
635 PRX44, and PRX73 Control Root Hair Growth in *Arabidopsis thaliana*. *Int J Mol Sci*.  
636 11;23(10):5375. doi: 10.3390/ijms23105375
- 637 Merkouropoulos G, Shirsat AH. (2003) The unusual *Arabidopsis* extensin gene atExt1 is  
638 expressed throughout plant development and is induced by a variety of biotic and abiotic  
639 stresses. *Planta*. 217(3):356-66. doi: 10.1007/s00425-003-1002-y
- 640 Ndinyanka Fabrice T, Kaech A, Barmettler G, Eichenberger C, Knox JP, Grossniklaus U, Ringli C  
641 (2017) Efficient preparation of *Arabidopsis* pollen tubes for ultrastructural analysis using  
642 chemical and cryo-fixation. *BMC Plant Biol* 17: 176
- 643 Olvera-Carrillo Y et al (2015) A conserved core of programmed cell death indicator genes  
644 discriminates developmentally and environmentally induced programmed cell death in  
645 plants. *Plant Physiol* 169:2684–2699. doi:10.1104/pp.15.00769
- 646 Ringli C. (2010). The hydroxyproline-rich glycoprotein domain of the *Arabidopsis* LRX1 requires  
647 Tyr for function but not for insolubilization in the cell wall. *Plant Journal* 63, 662–669
- 648 Sede AR, Borassi C, Wengier DL, Mecchia MA, Estevez JM, Muschietti JP (2018) *Arabidopsis*  
649 pollen extensins LRX are required for cell wall integrity during pollen tube growth. *FEBS*  
650 *Lett* 592:233-243
- 651 Schmid M, Simpson D, Gietl C (1999) Programmed cell death in castor bean endosperm is  
652 associated with the accumulation and release of a cysteine endopeptidase from  
653 ricinosomes. *Proc Natl Acad Sci USA* 96:14159–14164. doi:10.1073/pnas.96.24.14159
- 654 Schmid M, Simpson DJ, Sarioglu H, Lottspeich F, Gietl C (2001) The ricinosomes of senescing  
655 plant tissue bud from the endoplasmic reticulum. *Proc Natl Acad Sci USA* 98:5353–5358.  
656 doi:10.1073 /pnas.061038298
- 657 Schnabelrauch LS, Kieliszewski M, Upham BL, Alizedeh H, Lamport DT. (1996) Isolation of pl 4.6  
658 extensin peroxidase from tomato cell suspension cultures and identification of Val-Tyr-  
659 Lys as putative intermolecular cross-link site. *Plant J*. 9(4):477-89. doi: 10.1046/j.1365-  
660 313x.1996.09040477.x.
- 661 Showalter AM, Keppler B, Lichtenberg J, Gu D, Welch LR. (2010). A bioinformatics approach to  
662 the identification, classification, and analysis of hydroxyproline-rich glycoproteins. *Plant*  
663 *physiology* 153, 485–513
- 664 Strasser, R. (2016). Plant protein glycosylation. *Glycobiology* 1014. doi:  
665 10.1093/glycob/cww023
- 666 Su W, Liu Y, Xia Y, Hong Z, Li J. (2012). The *Arabidopsis* homolog of the mammalian OS-9 protein  
667 plays a key role in the endoplasmic reticulum associated degradation of misfolded  
668 receptor-like kinases. *Mol Plant*. 5:929–940
- 669 Su W, Liu Y, Xia Y, Hong Z, Li J. (2011). Conserved endoplasmic reticulum-associated degradation  
670 system to eliminate mutated receptor-like kinases in *Arabidopsis*. *Proc Natl Acad Sci USA*.  
671 108:870–875
- 672 Tanaka, T., Yamauchi, D., and Minamikawa, T. (1991). Nucleotide sequence of cDNA for an  
673 endopeptidase (EP-C1) from pods of maturing *Phaseolus vulgaris* fruits. *Plant Mol. Biol*.  
674 16: 1083–1084
- 675 Than ME, Helm M, Simpson DJ, Lottspeich F, Huber R, Gietl C (2004) The 2.0 Å crystal structure  
676 and substrate specificity of the KDEL-tailed cysteine endopeptidase functioning in  
677 programmed cell death of *Ricinus communis* endosperm. *J Mol Biol* 336:1103–1116.  
678 doi:10.1016/j.jmb.2003.12.075

- 679 Trott O, Olson AJ. (2010) AutoDock Vina: improving the speed and accuracy of docking with a  
680 new scoring function, efficient optimization, and multithreading. *J Comput Chem.*  
681 31(2):455–61.
- 682 Velasquez SM, Ricardi MM, Dorosz JG, *et al.* (2011). O-Glycosylated Cell Wall Proteins Are  
683 Essential in Root Hair Growth. *Science* 332, 1401–1403.
- 684 Velasquez SM, Marzol E, Borassi C, Pol-Fachin L, Ricardi MM, *et al.* (2015). Low sugar is not  
685 always good: Impact of specific O-glycan defects on tip growth in Arabidopsis. *Plant*  
686 *physiology* 168, 808–813
- 687 Velasquez M, Salter JS, Dorosz JG, Petersen BL, Estevez JM. (2012). Recent advances on the  
688 posttranslational modifications of EXTs and their roles in plant cell walls. *Frontiers in plant*  
689 *science* 3, 93
- 690 Wang, X., Wang, K., Yin, G., Liu, X., Liu, M., Cao, N., Duan, Y., Gao, H., Wang, W., Ge, W., *et al.*  
691 (2018). Pollen-expressed leucine-rich repeat extensins are essential for pollen  
692 germination and growth. *Plant Physiol.* 176, 1993–2006
- 693 Xie Q, Frugis G, Colgan D, Chua NH (2000) Arabidopsis NAC1 transduces auxin signal  
694 downstream of TIR1 to promote lateral root development. *Genes Dev* 14: 3024–3036
- 695 Xie C, Li C, Wang F, Zhang F, Liu J, Wang J, Zhang X, Kong X, Ding Z. (2023) NAC1 regulates root  
696 ground tissue maturation through coordinating with SCR/SHR-CYCD6;1 module in  
697 Arabidopsis. *Mol Plant.* S1674-2052(23)00039-4. doi: 10.1016/j.molp.2023.02.006.
- 698 Zhang D *et al* (2014) The cysteine protease AtCEP1, a key executor involved in tapetal  
699 programmed cell death, regulates pollen development in Arabidopsis. *Plant Cell* 26:2939–  
700 2961. doi:10.1105/tpc.114.127282
- 701 Zhou L-Z, Howing, T., Muller B., Hammes U.Z, Gietl C., Dresselhaus T. (2016) Expression analysis  
702 of KDEL-CysEPs programmed cell death markers during reproduction in Arabidopsis. *Plant*  
703 *Reprod* DOI 10.1007/s00497-016-0288-4
- 704 Zuo J, Niu QW, Chua NH (2000) Technical advance: An estrogen receptor-based transactivator  
705 XVE mediates highly inducible gene expression in transgenic plants. *Plant J.* 24: 265-273  
706
- 707
- 708

## Supplementary Materials

### RESEARCH REPORT

#### **NAC1 directs CEP1-CEP3 peptidase expression and **modulates** root hair growth in Arabidopsis**

Diana R. Rodríguez-García<sup>1</sup>, Yossmayer del Carmen Rondón Guerrero<sup>1</sup>, Lucía Ferrero<sup>2</sup>, Andrés Hugo Rossi<sup>1</sup>, Esteban A. Miglietta<sup>1</sup>, Ariel. A. Aptekmann<sup>3,4</sup>, Eliana Marzol<sup>1</sup>, Javier Martínez Pacheco<sup>1</sup>, Mariana Carignani<sup>1</sup>, Victoria **Berdion** Gabarain<sup>1</sup>, Leonel E. Lopez<sup>1</sup>, Gabriela Díaz Dominguez<sup>1</sup>, Cecilia Borassi<sup>1</sup>, José Juan Sánchez-Serrano<sup>6</sup>, Lin Xu<sup>5</sup>, Alejandro D. Nadra<sup>3,4</sup>, Enrique Rojo<sup>6</sup>, Federico Ariel<sup>2</sup>, José M. Estevez<sup>1,7,8,9,†</sup>

<sup>1</sup>Fundación Instituto Leloir and IIBBA-CONICET. Av. Patricias Argentinas 435, Buenos Aires C1405BWE, Argentina.

<sup>2</sup>Instituto de Agrobiotecnología del Litoral, CONICET, Universidad Nacional del Litoral, Colectora Ruta Nacional 168 km 0, 3000, Santa Fe, Argentina.

<sup>3</sup>Departamento de Fisiología, Biología Molecular y Celular, Instituto de Biociencias, Biotecnología y Biología Traslacional (iB3). Facultad de Ciencias Exactas y Naturales, Universidad de Buenos Aires, Ciudad Universitaria, Buenos Aires C1428EGA, Argentina.

<sup>4</sup>Departamento de Química Biológica, Facultad de Ciencias Exactas y Naturales, Universidad de Buenos Aires (IQUIBICEN-CONICET), Ciudad Universitaria, Buenos Aires C1428EGA, Argentina.

<sup>5</sup>National Laboratory of Plant Molecular Genetics, CAS Center for Excellence in Molecular Plant Sciences, Institute of Plant Physiology and Ecology, Shanghai Institutes for Biological Sciences, Chinese Academy of Sciences, Shanghai 200032, China

<sup>6</sup>Centro Nacional de Biotecnología, Consejo Superior de Investigaciones Científicas, Cantoblanco, E-28049 Madrid, Spain

<sup>7</sup>Centro de Biotecnología Vegetal, Facultad de Ciencias de la Vida, Universidad Andrés Bello and Millennium Institute for Integrative Biology (iBio), Santiago, Chile

<sup>8</sup>ANID – Millennium Institute for Integrative Biology (iBio), 7500000 Santiago, Chile

<sup>9</sup>ANID –Millennium Nucleus for the Development of Super Adaptable Plants (MN-SAP), 8331150 Santiago, Chile

† Correspondence should be addressed. Email: [jestevez@leloir.org.ar](mailto:jestevez@leloir.org.ar) (J.M.E).

Word count: x,xxx



**Running Head:** AtCEP1-AtCEP3 negatively **modulates** root hair growth.

**Author for Correspondence:**

*José M. Estevez*

Fundación Instituto Leloir, Av. Patricias Argentinas 435, Buenos Aires C1405BWE, Argentina.  
TE: 54-115238-7500 EXT. 3206

Centro de Biotecnología Vegetal, Facultad de Ciencias de la Vida, Universidad Andrés Bello and  
Millennium Institute for Integrative Biology (iBio), Santiago CP 8370146, Chile.

Email: [jestevez@leloir.org.ar](mailto:jestevez@leloir.org.ar)

**Special Issue:** Plant cell walls

Figure S1-S6

Tables S1-S3

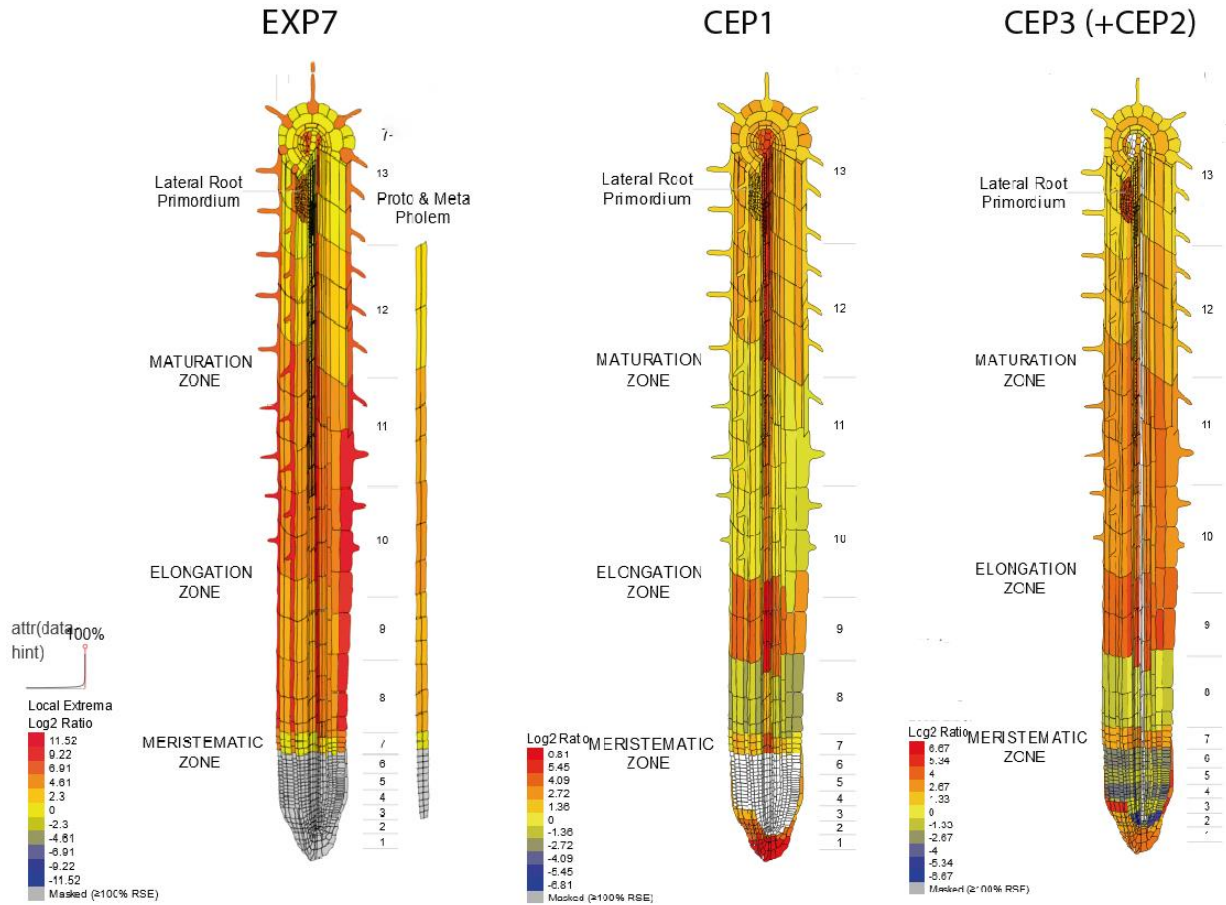

**Figure S1.** The *in silico* analysis of AtCEPs gene expression using Tissue Specific Root eFP (<http://bar.utoronto.ca/eplant/>). EXP7 was included as a root hair cell marker.

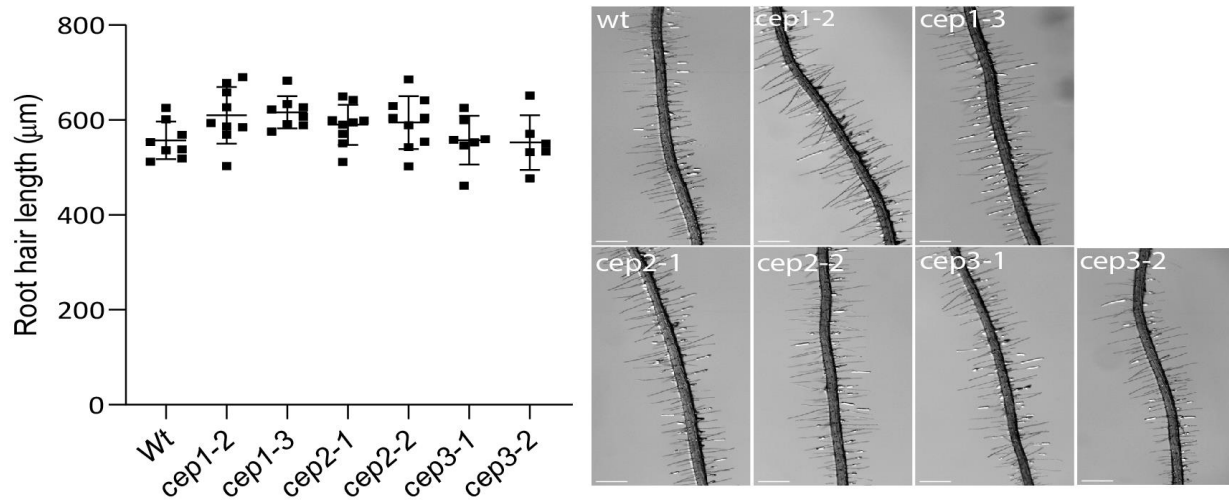

**Figure S2. Single *cep* mutants do not perturb root hair growth.** Quantitative analysis of RH length (mean  $\pm$  s.e.m.,  $n = 200$ ) in Wt Col-0 and in single *cep* mutants. Data are shown as the mean  $\pm$  SEM, ( $n=20$ ). (On the right) Selected images of RHs in Wt and in single and double *cep* mutants. Scale bar = 200  $\mu\text{m}$ .

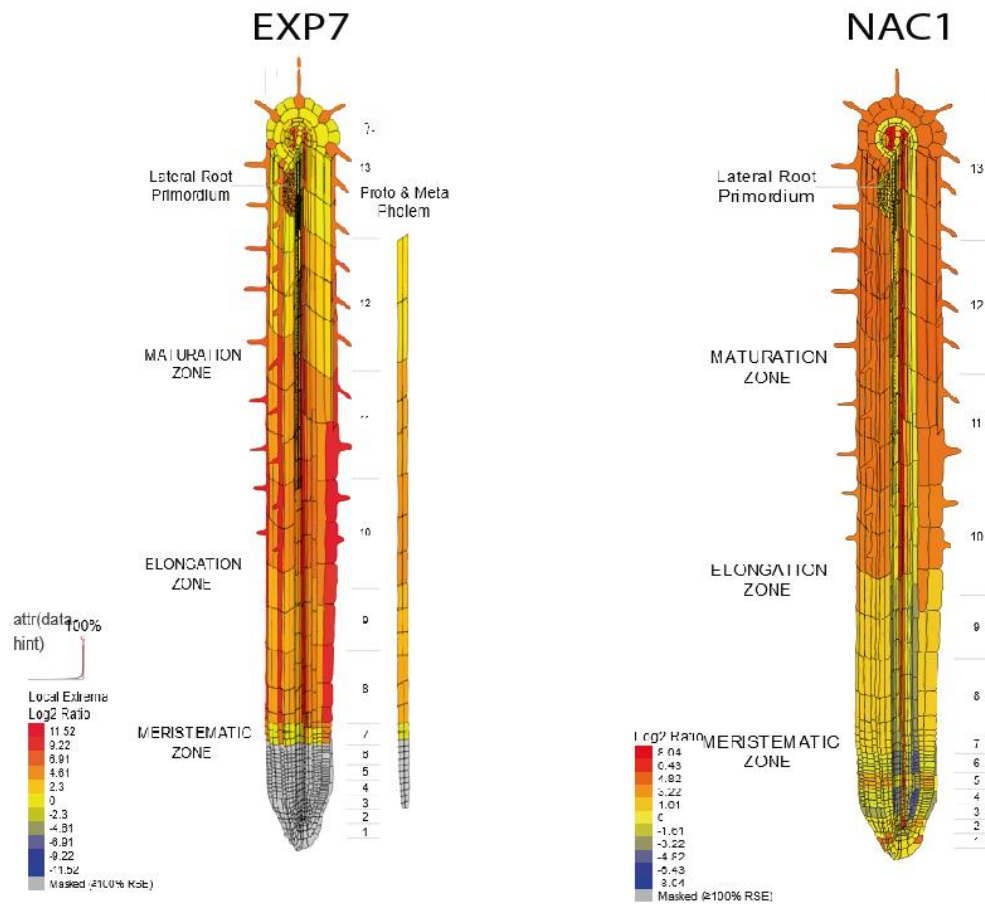

**Figure S3.** The *in silico* analysis of NAC1 expression using Tissue Specific Root eFP (<http://bar.utoronto.ca/eplant/>). EXP7 was included as a root hair cell marker.

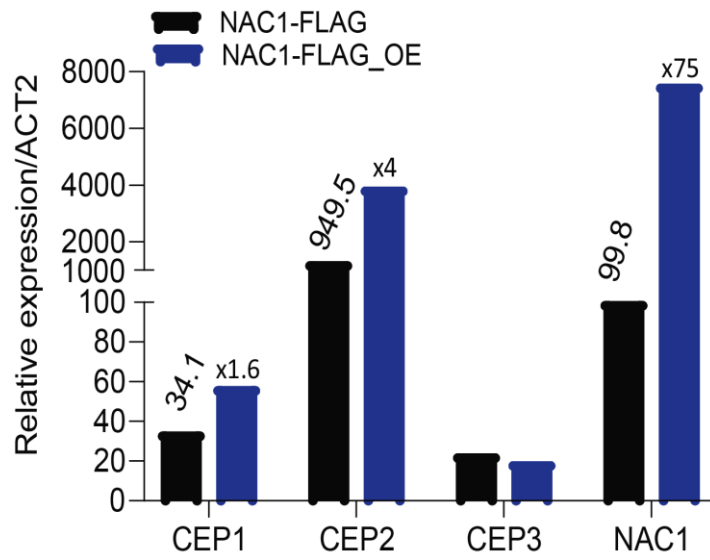

**Figure S4.** Induction of CEP1 and CEP2 by NAC1-FLAG inducible line (PER8pro:3×FLAG-NAC1). Gene-specific signals were normalized relatively to ACT2.

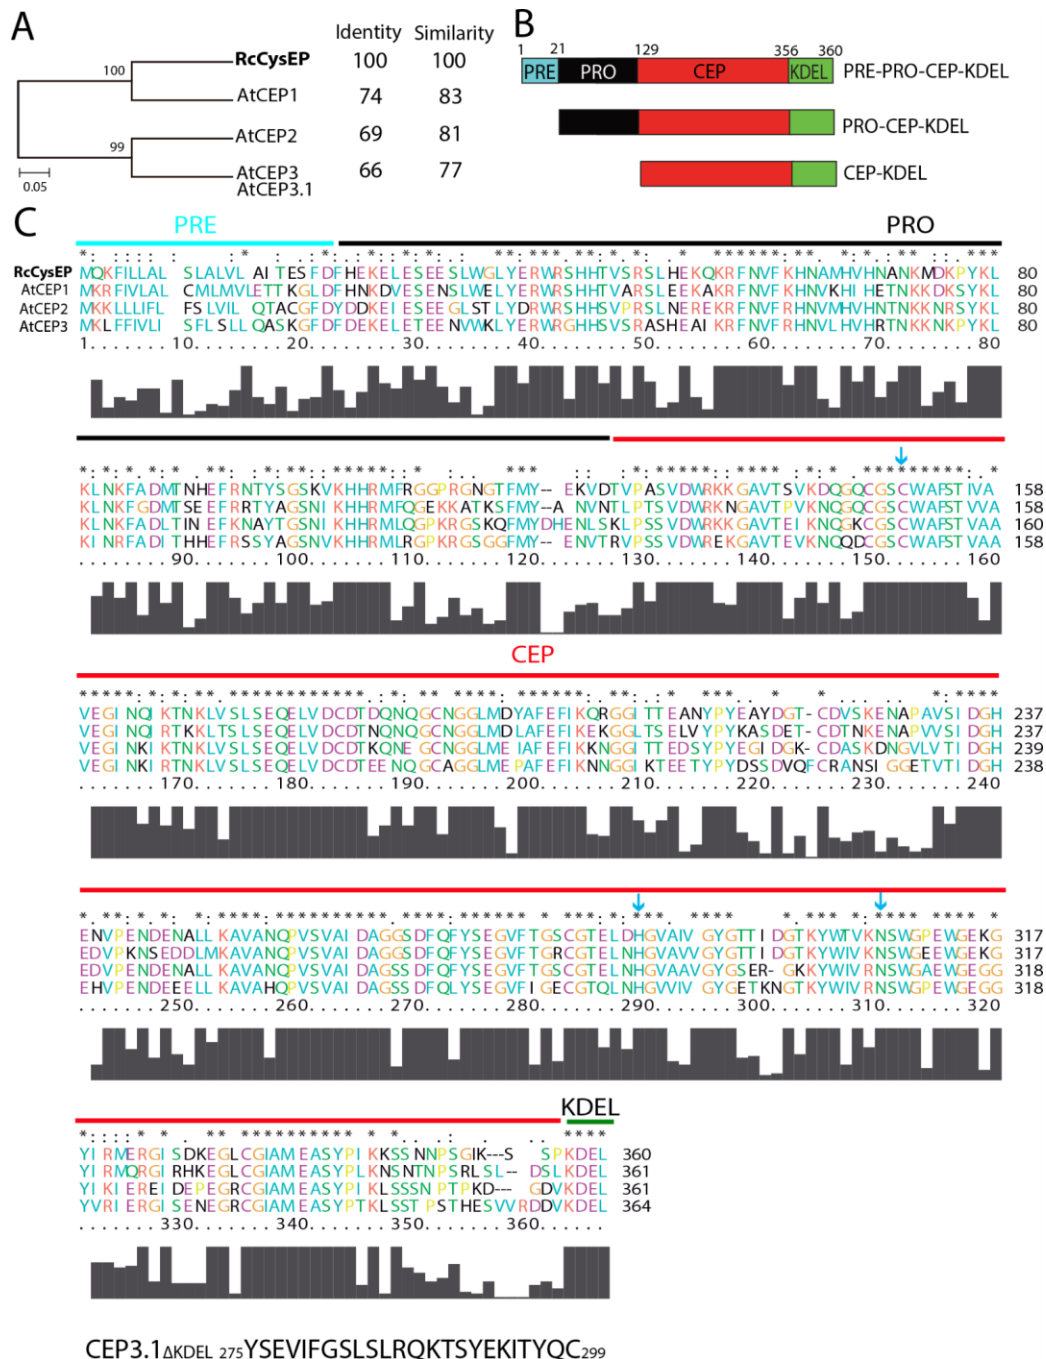

**Figure S5. Protein alignment and domains of AtCEP1-AtCEP3 sequences from *Arabidopsis thaliana* with Ricinus CEP 1SV4 (RcCysEP).** (A) Phylogenetic tree of Arabidopsis AtCEPs and Ricinus AtCEP. The phylogenetic analysis was carried out with MEGA6 (Tamura et al., 2007) using the Maximum Similarity method (Maximum Likelihood) (Saitou and Nei, 1987). The numbers in the nodes indicate the bootstrap values obtained for 1000 iterations. Scale represents the evolutionary distance, expressed as the number of substitutions per amino acid. (B) AtCEP protein domains. AtCEPs are synthesized as pre-pro-enzyme, which is then co-translationally synthesized into the ER, where the pre-sequence is removed, and pro-enzyme is finally released from the ricinosomes. KDEL is an ER retention signal peptide. (C) AtCEP1-AtCEP3 Protein alignment. PRE, PRO and KDEL domains are indicated.



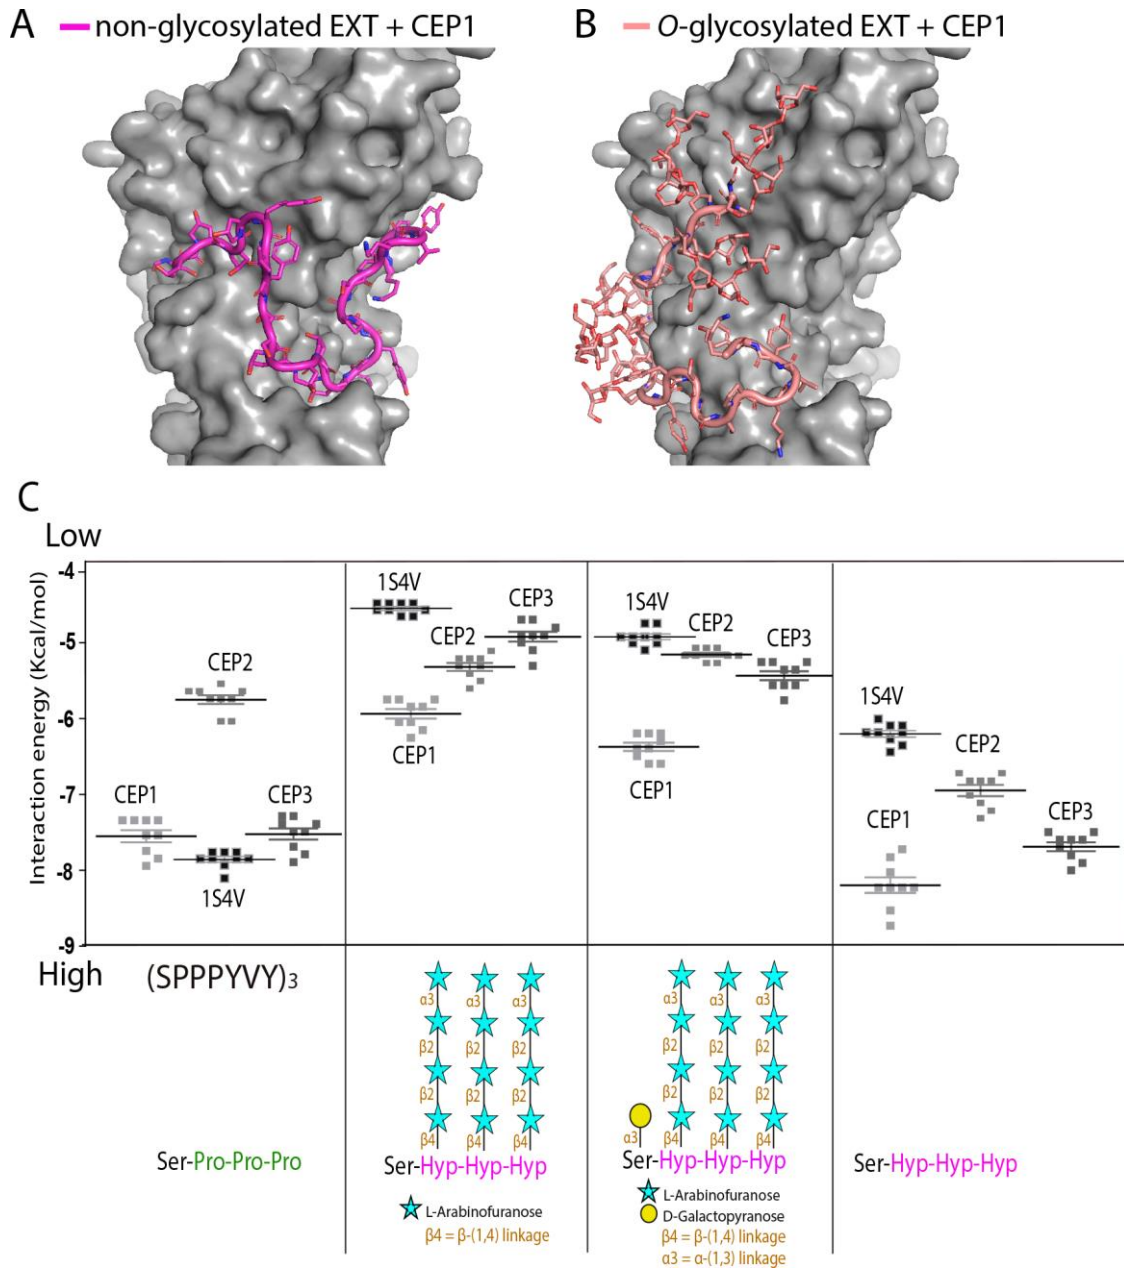

**Figure S6. Interaction by an *in silico* docking approach of AtCEP1, AtCEP2 and AtCEP3 with EXT peptides.** (A,B) Ten docking results for each EXT *O*-glycosylation state are shown superimposed on the AtCEP1 protein surface to evaluate the consistency of docking sites. (A) Model of AtCEP1 (protein surface shown in grey) complexed to a non-*O*-glycosylated EXT substrate (SPPPYVY)<sub>3</sub> (in magenta). (B) Model of AtCEP1 (protein surface shown in grey) complexed to an *O*-glycosylated-EXT substrate (protein and *O*-glycans shown in light red, both depicted as sticks). Arabino-galactosylated EXT peptide = [(SOOYVY)<sub>3</sub>-AG]. (C) Comparison of the binding energy of different AtCEP1-AtCEP3 and 1S4V (Ricin AtCEP included as a control) to EXT substrates with different degrees of *O*-glycosylation. (from left to right) A non-hydroxylated EXT peptide (SPPPYVY)<sub>3</sub>, a hydroxylated but not *O*-glycosylated EXT peptide [(SOOYVY)<sub>3</sub>; O=hydroxyproline], only arabinosylated EXT-peptide [(SOOYVY)<sub>3</sub>-A], and arabinogalactosylated EXT peptide [(SOOYVY)<sub>3</sub>-AG] were analyzed.

**Table S1.** Mutant lines used in this study.

| <b>NAME</b>          | <b>ATG code</b>  |               | <b>Mutant line</b> | <b>Reference</b>     |
|----------------------|------------------|---------------|--------------------|----------------------|
| <b><i>NAC1</i></b>   | <i>At1g56010</i> | <i>nac1-2</i> | CS1013025          | This work            |
| <b><i>AtCEP1</i></b> | <i>At5g50260</i> | <i>cep1-2</i> | SALK_137016        | This work            |
|                      |                  | <i>cep1-3</i> | SAIL_158_B06       | (Höwing et al. 2014) |
| <b><i>AtCEP2</i></b> | <i>At3g48340</i> | <i>cep2-1</i> | SALK_079519        | This work            |
|                      |                  | <i>cep2-2</i> | CSHET_6591         | (Hierl et al. 2014)  |
| <b><i>AtCEP3</i></b> | <i>At3g48350</i> | <i>cep3-1</i> | SALK_024692        | This work            |
|                      |                  | <i>cep3-2</i> | SALK_016791        | This work            |

**Table S2.** Transgenic lines used in this study.

| <b>NAME</b>                                 | <b>CONSTRUCTION</b>                             | <b>BACKGROUND</b> | <b>REFERENCE</b>     |
|---------------------------------------------|-------------------------------------------------|-------------------|----------------------|
| <b>PER8pro::AtCEP2</b>                      | promoterPER8::AtCEP2                            | Wt Col-0          | (Chen et al. 2016)   |
| <b>PER8pro::AtCEP1</b>                      | promoterPER8::AtCEP1                            | Wt Col-0          | (Chen et al. 2016)   |
| <b>PER8pro::3×FLAG-NAC1</b>                 | promoterPER8::3×FLAG-NAC1                       | Wt Col-0          | (Chen et al. 2016)   |
| <b>NAC1pro::NAC1-GUS</b>                    | promoterNAC1::NAC1-GUS                          | Wt Col-0          | (Chen et al. 2016)   |
| <b>AtCEP1pro::3xHA-EGFP-AtCEP1-KDEL</b>     | promoterAtCEP1:: PRE-PRO-3xHA-EGFP-AtCEP1-KDEL  | <i>cep1-3</i>     | (Höwing et al. 2014) |
| <b>AtCEP1pro::3xHA-EGFP-KDEL</b>            | promoterAtCEP1:: PRE-PRO-3xHA-EGFP-KDEL         | <i>cep1-3</i>     | (Höwing et al. 2014) |
| <b>AtCEP2pro:: 3xHA-mCherry-KDEL</b>        | promoterAtCEP2::PRE-PRO-3xHA-mCherry-KDEL       | <i>cep2-2</i>     | (Hierl et al. 2014)  |
| <b>AtCEP2pro::3xHA-mCherry -AtCEP2-KDEL</b> | promoterAtCEP2::PRE-PRO-3xHA-mCherry-AtCEP2KDEL | Wt Col-0          | (Hierl et al. 2014)  |
| <b>AtCEP3pro::GFP</b>                       | promoterAtCEP3::GFP                             | Wt Col-0          | This work            |
| <b>NAC1pro::GFP</b>                         | promoterNAC1::GFP                               | Wt Col-0          | This work            |

**Table S3.** List of primer used.

|               |                           |
|---------------|---------------------------|
| PP2A RT-F     | GTCGACCAAGCGTTGTGGAGA     |
| PP2A RT-R     | ACGCCAACGAACAAATCACAGA    |
| AtCEP1 RT-F   | AAACCAAGGCCAATGCGGGAGTTG  |
| AtCEP1 RT-R   | TTCCGCATCTCCCGGTAAACACTC  |
| AtCEP2 RT-F   | CCGGTTCCAACATCAAGCATCAC   |
| AtCEP2 RT-R   | AGATCCGTAAACACTCCCTCTG    |
| NAC1 RT-F     | TGAGCTCTCCAAAGGAAGACTGG   |
| NAC1 RT-R     | ACAGAATGAGTCGAGGCCTGTG    |
| CEP1 CHIP A F | CACATGCACGGCTTTTCAAAT     |
| CEP1 CHIP A R | TCAAAGCACAACCTTGACGCAAC   |
| CEP1 CHIP B F | AGAGCTTGCTTGCGCCATTA      |
| CEP1 CHIP B R | GGGGTTAAAGGATTACTTGTGGGA  |
| CEP2 CHIP A F | ATGGGCTGCGCCAAATGTTT      |
| CEP2 CHIP A R | ACGTCTTAAACCATGCACCGA     |
| CEP2 CHIP B F | TCGGACTTTTTGATTGGAATCCTCT |
| CEP2 CHIP B R | TCGTGGACCGATCCAACAG       |
| CEP3 CHIP A F | GAGGACCCAACCCATCTTCATC    |
| CEP3 CHIP A R | ACACGTACGTCCATTCCCATT     |

|                 |                         |
|-----------------|-------------------------|
| E2Fa CHIP B- F  | TTGCAGAGAATTGTGATT      |
| E2Fa CHIP B- R  | GAGAATCCGATCATAGAC      |
| NAC1_RT-qPCR FW | CTCCTCGAGGCCGTA AAACC   |
| NAC1_RT-qPCR RV | AGACCCAGTCTTCCTTTGGAG   |
| Actin F         | GGTAACATTGTGCTCAGTGGTGG |
| Actin R         | AACGACCTTAATCTTCATGCTGC |
